# Supplementary material for: Single-gold etching at the hypercarbon atom of C-centred hexagold(I) clusters protected by chiral N-heterocyclic carbenes
Source: PubMed Central journal article supplement (PMC11169362; doi:10.1038/s41467-024-49295-w), 2024-06-12
Supplement: 41467_2024_49295_MOESM1_ESM.pdf [file 41467_2024_49295_MOESM1_ESM.pdf]

## Supplementary Information

### Single-gold etching at the hypercarbon atom of C-centred hexagold(I) clusters protected by chiral *N*-heterocyclic carbenes

Xiao-Li Pei<sup>1,3</sup>, Pei Zhao<sup>2</sup>, Hitoshi Ube<sup>1</sup>, Zhen Lei<sup>1,4</sup>, Masahiro Ehara\*<sup>2</sup> & Mitsuhiro Shionoya\*<sup>1,3</sup>

<sup>1</sup>Department of Chemistry, Graduate School of Science, The University of Tokyo, Tokyo 113-0033, Japan

<sup>2</sup>Research Centre for Computational Science, Institute for Molecular Science and SOKENDAI, Myodaiji, Okazaki, Aichi 444-8585, Japan

<sup>3</sup>Current affiliation: Research Institute for Science and Technology, Tokyo University of Science, 2641 Yamazaki, Noda, Chiba 278-8510, Japan

<sup>4</sup>Current affiliation: Fujian Provincial Key Laboratory of Advanced Inorganic Oxygenated Materials, College of Chemistry, Fuzhou University, Fuzhou 350108, P. R. China

\*Email: ehara@ims.ac.jp; shionoya@chem.s.u-tokyo.ac.jp

## Table of Contents

|                                                                                                                                                                                                                          |    |
|--------------------------------------------------------------------------------------------------------------------------------------------------------------------------------------------------------------------------|----|
| Supplementary Figures.....                                                                                                                                                                                               | 4  |
| Supplementary Fig. 1. The schematic illustrations of the C-centred gold(I) clusters.....                                                                                                                                 | 4  |
| Supplementary Fig. 2. <sup>1</sup> H NMR spectrum of SS-2 <sup>NHC</sup> in <i>d</i> <sub>6</sub> -acetone (500 MHz, 300 K).....                                                                                         | 4  |
| Supplementary Fig. 3. <sup>13</sup> C NMR spectrum of SS-2 <sup>NHC</sup> in <i>d</i> <sub>6</sub> -acetone (126 MHz, 300 K).....                                                                                        | 5  |
| Supplementary Fig. 4. <sup>1</sup> H- <sup>1</sup> H COSY NMR spectrum of SS-2 <sup>NHC</sup> in <i>d</i> <sub>6</sub> -acetone (300 K).....                                                                             | 5  |
| Supplementary Fig. 5. <sup>13</sup> C- <sup>1</sup> H HSQC NMR spectrum of SS-2 <sup>NHC</sup> in <i>d</i> <sub>6</sub> -acetone (300 K). ....                                                                           | 6  |
| Supplementary Fig. 6. Comparison of <sup>1</sup> H NMR spectra of SS-2 <sup>NHC</sup> and SS-1 <sup>NHC</sup> in <i>d</i> <sub>6</sub> -acetone (500 MHz, 300 K). ....                                                   | 6  |
| Supplementary Fig. 7. Comparison of <sup>13</sup> C NMR spectra of SS-2 <sup>NHC</sup> and SS-1 <sup>NHC</sup> in <i>d</i> <sub>6</sub> -acetone (126 MHz, 300 K). ....                                                  | 7  |
| Supplementary Fig. 8. <sup>31</sup> P NMR spectrum of 2 <sup>TPP</sup> in <i>d</i> <sub>6</sub> -acetone (202 MHz, 300 K). ....                                                                                          | 7  |
| Supplementary Fig. 9. <sup>1</sup> H NMR spectrum of 2 <sup>TPP</sup> in <i>d</i> <sub>6</sub> -acetone (500 MHz, 300 K).....                                                                                            | 8  |
| Supplementary Fig. 10. <sup>13</sup> C NMR spectrum of 2 <sup>TPP</sup> in <i>d</i> <sub>6</sub> -acetone (126 MHz, 300 K).....                                                                                          | 8  |
| Supplementary Fig. 11. <sup>1</sup> H- <sup>1</sup> H COSY NMR spectrum of 2 <sup>TPP</sup> in <i>d</i> <sub>6</sub> -acetone (300 K). ....                                                                              | 9  |
| Supplementary Fig. 12. <sup>13</sup> C- <sup>1</sup> H HSQC NMR spectrum of 2 <sup>TPP</sup> in <i>d</i> <sub>6</sub> -acetone (300 K).....                                                                              | 9  |
| Supplementary Fig. 13. Single-crystal X-ray structures of cationic parts in SS-2 <sup>NHC</sup> , RR-2 <sup>NHC</sup> and 2 <sup>TPP</sup> at the 50% thermal ellipsoid probability.. ....                               | 10 |
| Supplementary Fig. 14. Single-crystal X-ray structure of 3 at the 50% thermal ellipsoid probability.....                                                                                                                 | 10 |
| Supplementary Fig. 15. Comparison of the single-crystal structures of SS-2 <sup>NHC</sup> (orange) and SS-1 <sup>NHC</sup> (grey). ....                                                                                  | 10 |
| Supplementary Fig. 16. The intermolecular interactions found in the packing structures of SS-2 <sup>NHC</sup> .....                                                                                                      | 11 |
| Supplementary Fig. 17. UV-vis absorption spectra, plotted as the molar absorptivity of SS-2 <sup>NHC</sup> , 2 <sup>TPP</sup> , SS-1 <sup>NHC</sup> and 1 <sup>TPP</sup> in CH <sub>2</sub> Cl <sub>2</sub> (293 K)..... | 11 |
| Supplementary Fig. 18. Excitation and emission spectra of SS-2 <sup>NHC</sup> , 2 <sup>TPP</sup> , SS-1 <sup>NHC</sup> and 1 <sup>TPP</sup> in the solid state (293 K). ....                                             | 12 |
| Supplementary Fig. 19. Emission spectra of SS-2 <sup>NHC</sup> in acetone, inset: photo under light irradiation at 365 nm. ....                                                                                          | 12 |
| Supplementary Fig. 20. The absolute quantum yields (QYs) of SS-2 <sup>NHC</sup> , 2 <sup>TPP</sup> , SS-1 <sup>NHC</sup> and 1 <sup>TPP</sup> in the solid state. ....                                                   | 13 |
| Supplementary Fig. 21. Lifetimes of SS-2 <sup>NHC</sup> , 2 <sup>TPP</sup> , SS-1 <sup>NHC</sup> and 1 <sup>TPP</sup> in the solid state. ....                                                                           | 13 |
| Supplementary Fig. 22. TD-DFT calculated UV-vis absorption spectrum of SS-2 <sup>NHC</sup> in CH <sub>2</sub> Cl <sub>2</sub> .....                                                                                      | 14 |
| Supplementary Fig. 23. TD-DFT calculated UV-vis absorption spectrum of 2 <sup>TPP</sup> in CH <sub>2</sub> Cl <sub>2</sub> .....                                                                                         | 14 |
| Supplementary Fig. 24. TD-DFT calculated UV-vis absorption spectrum of 1 <sup>TPP</sup> in CH <sub>2</sub> Cl <sub>2</sub> .....                                                                                         | 14 |
| Supplementary Fig. 25. The frontier molecular orbitals in SS-2 <sup>NHC</sup> calculated by DFT. ....                                                                                                                    | 15 |
| Supplementary Fig. 26. The frontier molecular orbitals in 2 <sup>TPP</sup> calculated by DFT.....                                                                                                                        | 16 |
| Supplementary Fig. 27. The frontier molecular orbitals in 1 <sup>TPP</sup> calculated by DFT.....                                                                                                                        | 17 |
| Supplementary Fig. 28. Time-course UV-vis absorption spectra of the etching reaction of 1 <sup>TPP</sup> ( <i>c</i> = 5 × 10 <sup>-5</sup> M, 293 K) using <i>cis</i> -depe in dichloromethane. ....                     | 18 |

|                                                                                                                                                                                                                                                               |    |
|---------------------------------------------------------------------------------------------------------------------------------------------------------------------------------------------------------------------------------------------------------------|----|
| <b>Supplementary Fig. 29.</b> Time-course $^1\text{H}$ NMR spectra of $SS-1^{\text{NHC}}$ etched with <i>cis</i> -depe ( $d_6$ -acetone, 300 K)...                                                                                                            | 18 |
| <b>Supplementary Fig. 30.</b> Time-course $^1\text{H}$ NMR spectra of $1^{\text{TPP}}$ etched with <i>cis</i> -depe ( $d_6$ -acetone, 300 K).....                                                                                                             | 19 |
| <b>Supplementary Fig. 31.</b> The ESI-MS spectra of monitoring the reaction of $SS-1^{\text{NHC}}$ etched with <i>cis</i> -depe. ....                                                                                                                         | 20 |
| <b>Supplementary Fig. 32.</b> The ESI-MS spectra of monitoring the reaction of $1^{\text{TPP}}$ and <i>cis</i> -depe. ....                                                                                                                                    | 20 |
| <b>Supplementary Fig. 33.</b> Calculated energy profiles for the proposed etching mechanism.....                                                                                                                                                              | 21 |
| <b>Supplementary Fig. 34.</b> $^1\text{H}$ NMR spectra showing stability studies of $SS-2^{\text{NHC}}$ in $d_6$ -acetone for one week. ....                                                                                                                  | 22 |
| <b>Supplementary Fig. 35.</b> $^1\text{H}$ NMR spectrum of $SS-2^{\text{NHC}}$ in $\text{CDCl}_3$ (500 M, 300 K).....                                                                                                                                         | 22 |
| <b>Supplementary Fig. 36.</b> $^{31}\text{P}$ NMR and $^1\text{H}$ NMR spectra of crystalline $2^{\text{TPP}}$ in $\text{CDCl}_3$ (300 K).....                                                                                                                | 23 |
| <b>Supplementary Fig. 37.</b> Single-crystal X-ray structures of the Cl-coordinated $\text{CAu}^{\text{I}}_6$ clusters. ....                                                                                                                                  | 24 |
| <b>Supplementary Fig. 38.</b> $^1\text{H}$ NMR spectrum of $SS-4^{\text{NHC}}$ in $d_6$ -acetone (500 MHz, 300 K).....                                                                                                                                        | 25 |
| <b>Supplementary Fig. 39.</b> $^{13}\text{C}$ NMR spectrum of $SS-4^{\text{NHC}}$ in $d_6$ -acetone (126 MHz, 300 K).....                                                                                                                                     | 25 |
| <b>Supplementary Fig. 40.</b> $^1\text{H}$ - $^1\text{H}$ COSY NMR spectrum of $SS-4^{\text{NHC}}$ in $d_6$ -acetone (300 K).....                                                                                                                             | 26 |
| <b>Supplementary Fig. 41.</b> $^{13}\text{C}$ - $^1\text{H}$ HSQC NMR spectrum of $SS-4^{\text{NHC}}$ in $d_6$ -acetone (300 K). ....                                                                                                                         | 26 |
| <b>Supplementary Fig. 42.</b> CD spectra of the C-centred gold(I) clusters.....                                                                                                                                                                               | 27 |
| <b>Supplementary Tables</b> .....                                                                                                                                                                                                                             | 28 |
| <b>Supplementary Table 1.</b> Crystallographic data of $SS-2^{\text{NHC}}$ , $RR-2^{\text{NHC}}$ and $2^{\text{TPP}}$ .....                                                                                                                                   | 28 |
| <b>Supplementary Table 2.</b> Important bond lengths and angles of $SS-2^{\text{NHC}}$ , $RR-2^{\text{NHC}}$ and $2^{\text{TPP}}$ .....                                                                                                                       | 29 |
| <b>Supplementary Table 3.</b> Bond length ( $d$ , Å) and Wiberg bond order (WBO) of $\text{C}_{\text{centre}}-\text{Au}^{\text{I}}$ and $\text{Au}^{\text{I}}\cdots\text{Au}^{\text{I}}$ in different $\text{CAu}^{\text{I}}_n$ ( $n = 5, 6$ ) clusters. .... | 29 |
| <b>Supplementary Table 4.</b> Excited states of $SS-2^{\text{NHC}}$ with oscillator strength ( $f$ ) larger than 0.04 calculated by TD-DFT. ....                                                                                                              | 30 |
| <b>Supplementary Table 5.</b> Excited states of $2^{\text{TPP}}$ with oscillator strength ( $f$ ) larger than 0.04 calculated by TD-DFT. ....                                                                                                                 | 31 |
| <b>Supplementary Table 6.</b> Orbital composition analysis with Mulliken partition of $SS-2^{\text{NHC}}$ . ....                                                                                                                                              | 32 |
| <b>Supplementary Table 7.</b> Orbital composition analysis with Mulliken partition of $2^{\text{TPP}}$ .....                                                                                                                                                  | 32 |
| <b>Supplementary Table 8.</b> Orbital composition analysis with Mulliken partition of $1^{\text{TPP}}$ .....                                                                                                                                                  | 32 |
| <b>Supplementary Table 9.</b> TD-DFT calculated emission values of $SS-1^{\text{NHC}}$ and $SS-2^{\text{NHC}}$ . ....                                                                                                                                         | 32 |
| <b>Supplementary Table 10.</b> Crystallographic data of $SS-4^{\text{NHC}}$ and $RR-4^{\text{NHC}}$ .....                                                                                                                                                     | 33 |
| <b>Supplementary Table 11.</b> Important bond lengths and angles of $SS-4^{\text{NHC}}$ and $RR-4^{\text{NHC}}$ .....                                                                                                                                         | 34 |
| <b>Supplementary Note</b> .....                                                                                                                                                                                                                               | 34 |
| <b>Supplementary References</b> .....                                                                                                                                                                                                                         | 34 |

## Supplementary Figures

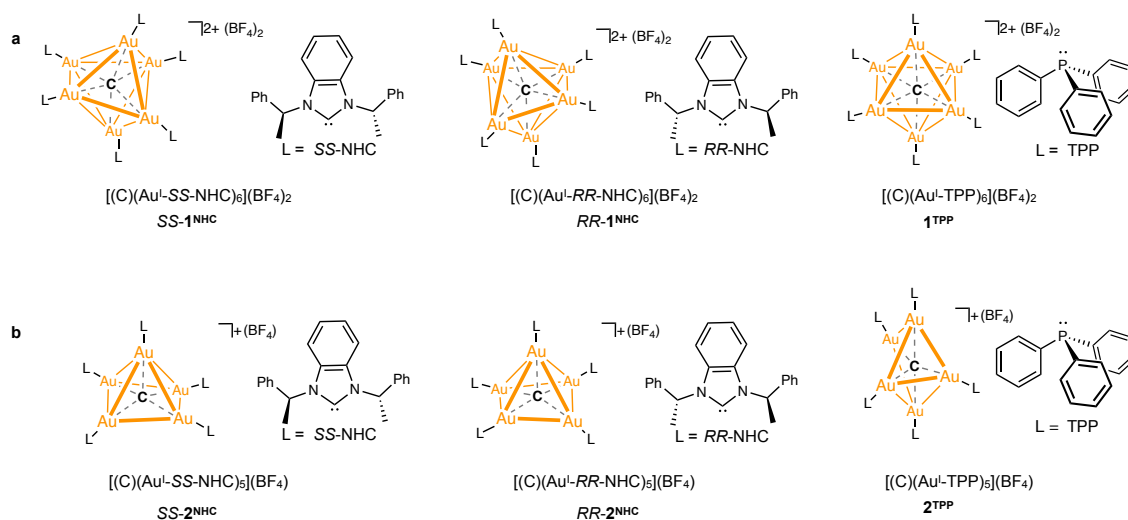

**Supplementary Fig. 1.** The schematic illustrations of the C-centred gold(I) clusters.

**a** The CAu<sup>I</sup><sub>6</sub> clusters: [(C)(Au<sup>I</sup>-SS-NHC)<sub>6</sub>](BF<sub>4</sub>)<sub>2</sub> (SS-1<sup>NHC</sup>)<sup>1</sup>, [(C)(Au<sup>I</sup>-RR-NHC)<sub>6</sub>](BF<sub>4</sub>)<sub>2</sub> (RR-1<sup>NHC</sup>)<sup>9</sup>, [(C)(Au<sup>I</sup>-TPP)<sub>6</sub>](BF<sub>4</sub>)<sub>2</sub> (1<sup>TPP</sup>)<sup>2</sup>. **b** The CAu<sup>I</sup><sub>5</sub> clusters: [(C)(Au<sup>I</sup>-SS-NHC)<sub>5</sub>](BF<sub>4</sub>) (SS-2<sup>NHC</sup>), [(C)(Au<sup>I</sup>-RR-NHC)<sub>5</sub>](BF<sub>4</sub>) (RR-2<sup>NHC</sup>), [(C)(Au<sup>I</sup>-TPP)<sub>5</sub>](BF<sub>4</sub>) (2<sup>TPP</sup>)<sup>3</sup>.

Note: another Au<sup>I</sup>⋯Au<sup>I</sup> interaction was observed in the structure of 2<sup>TPP</sup>, which was slightly different from the reported data<sup>14</sup>.

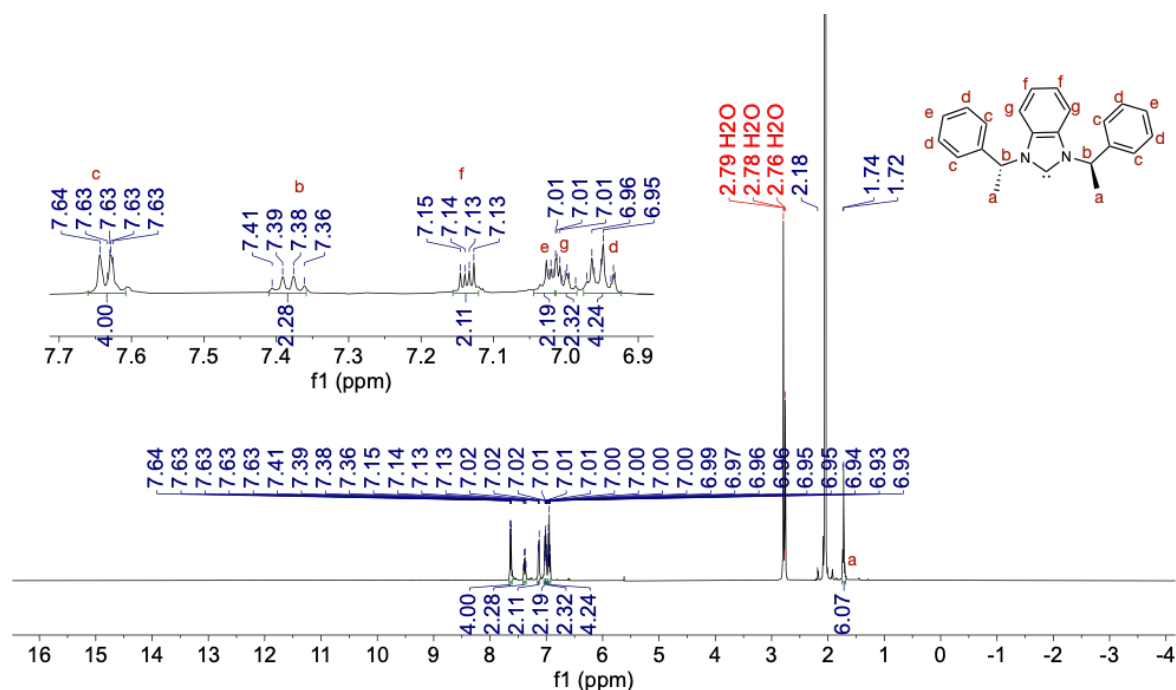

**Supplementary Fig. 2.** <sup>1</sup>H NMR spectrum of SS-2<sup>NHC</sup> in *d*<sub>6</sub>-acetone (500 MHz, 300 K).

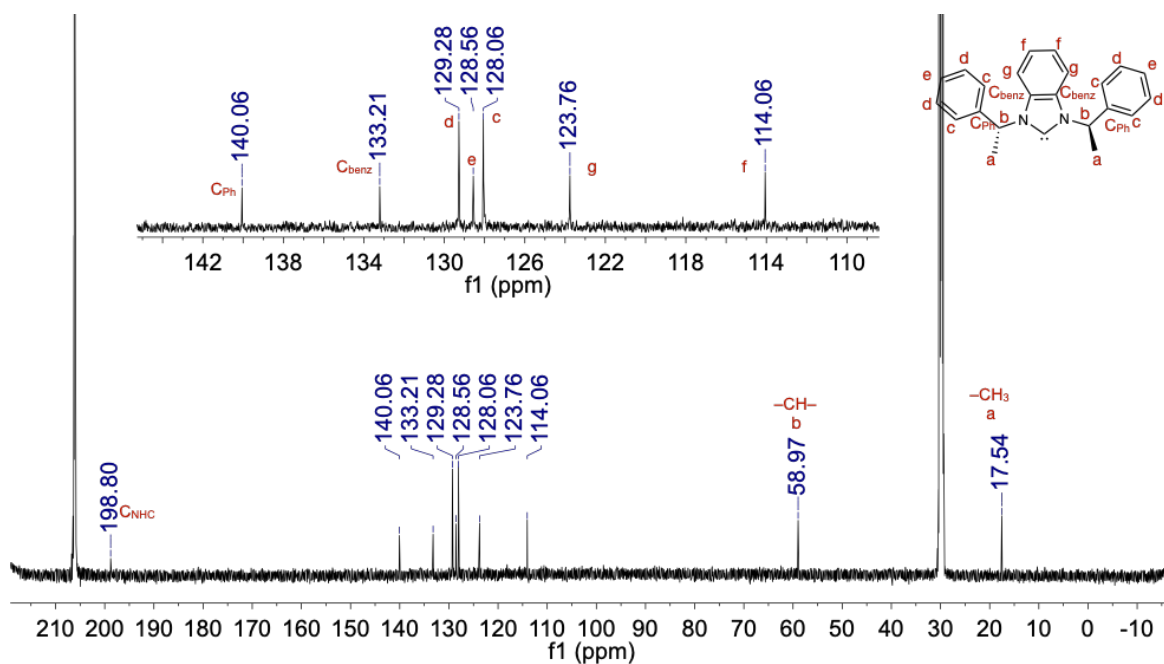

Supplementary Fig. 3. <sup>13</sup>C NMR spectrum of SS-2<sup>NHC</sup> in *d*<sub>6</sub>-acetone (126 MHz, 300 K).

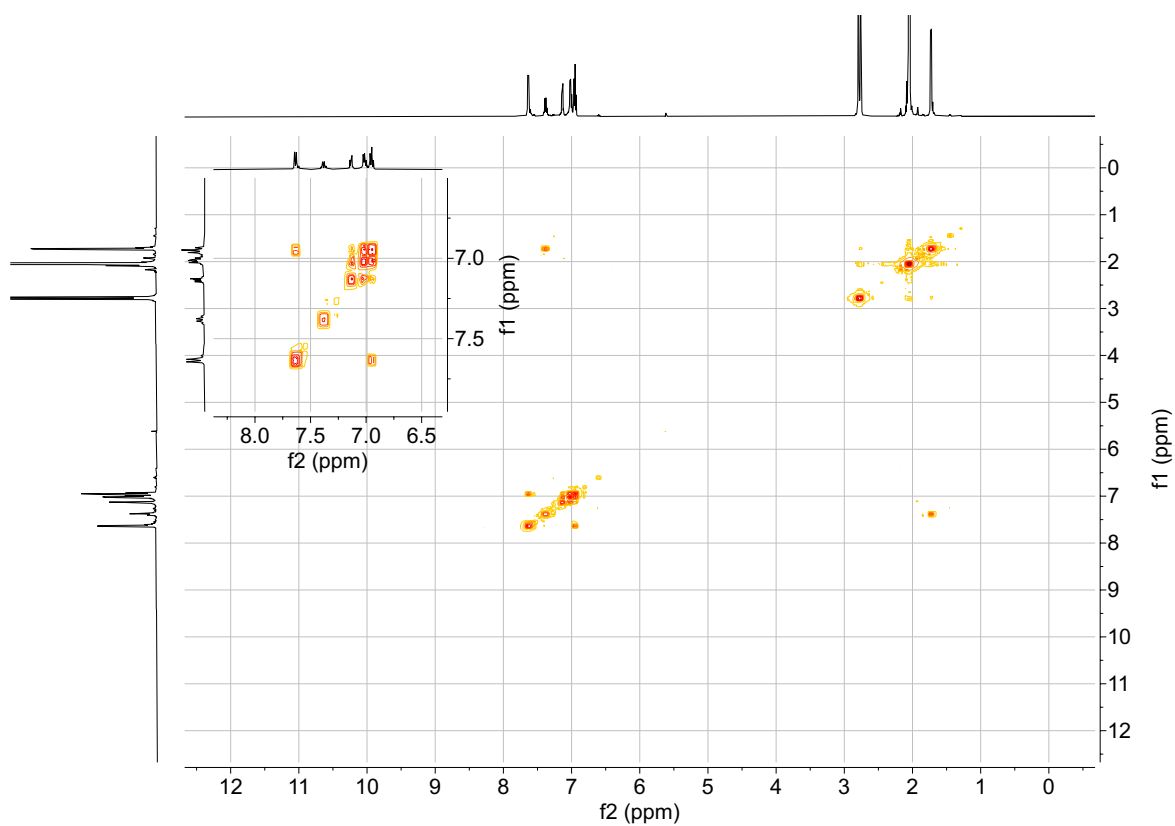

Supplementary Fig. 4. <sup>1</sup>H-<sup>1</sup>H COSY NMR spectrum of SS-2<sup>NHC</sup> in *d*<sub>6</sub>-acetone (300 K).

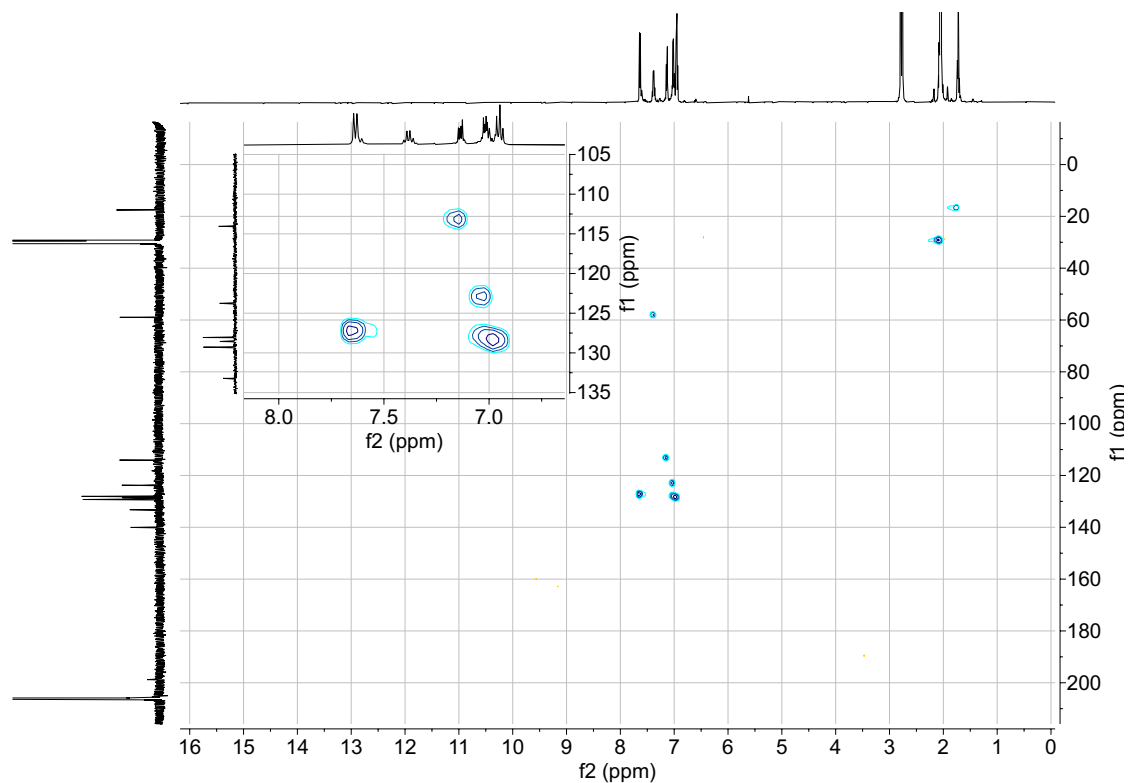

Supplementary Fig. 5.  $^{13}\text{C}$ - $^1\text{H}$  HSQC NMR spectrum of  $\text{SS-2}^{\text{NHC}}$  in  $d_6$ -acetone (300 K).

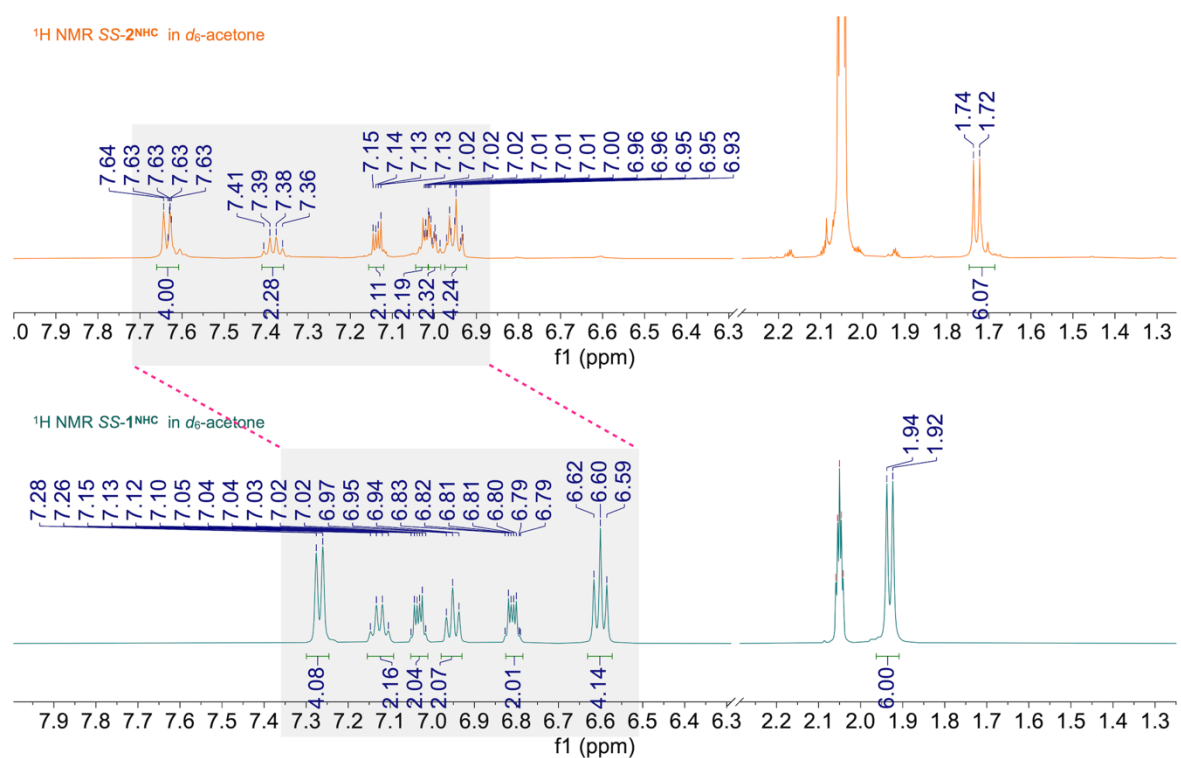

Supplementary Fig. 6. Comparison of  $^1\text{H}$  NMR spectra of  $\text{SS-2}^{\text{NHC}}$  and  $\text{SS-1}^{\text{NHC}}$  in  $d_6$ -acetone (500 MHz, 300 K).

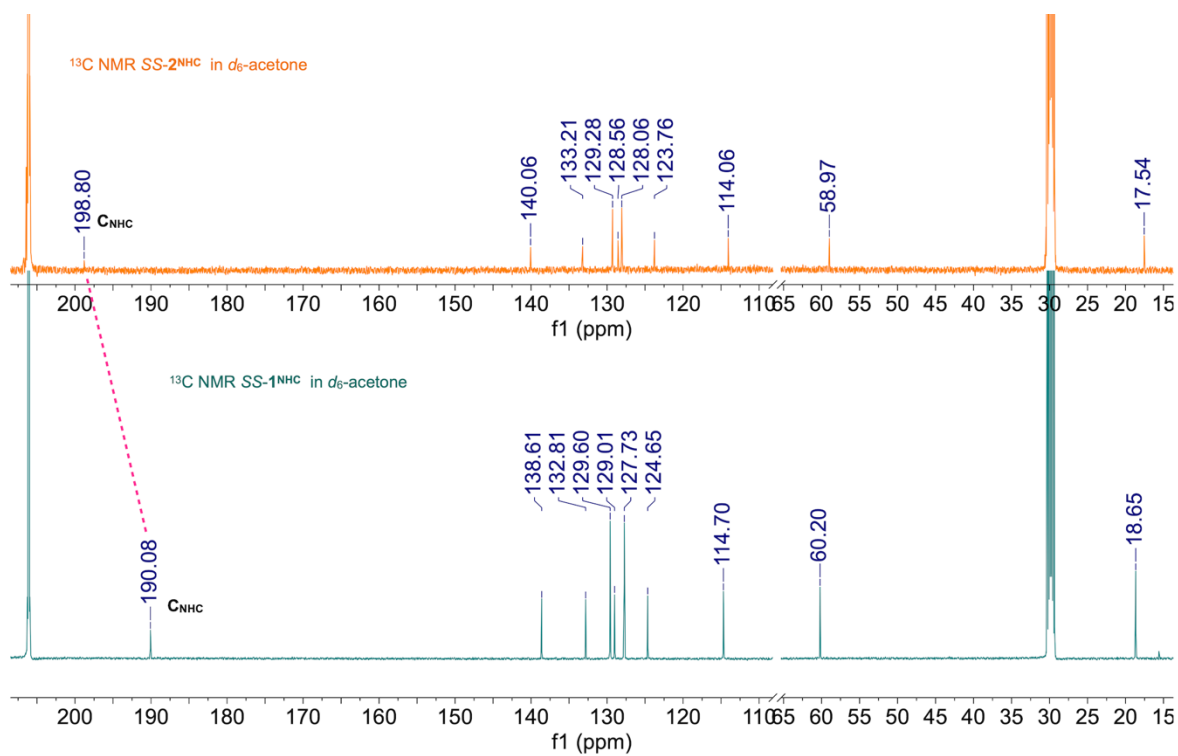

**Supplementary Fig. 7.** Comparison of <sup>13</sup>C NMR spectra of SS-2<sup>NHC</sup> and SS-1<sup>NHC</sup> in d<sub>6</sub>-acetone (126 MHz, 300 K).

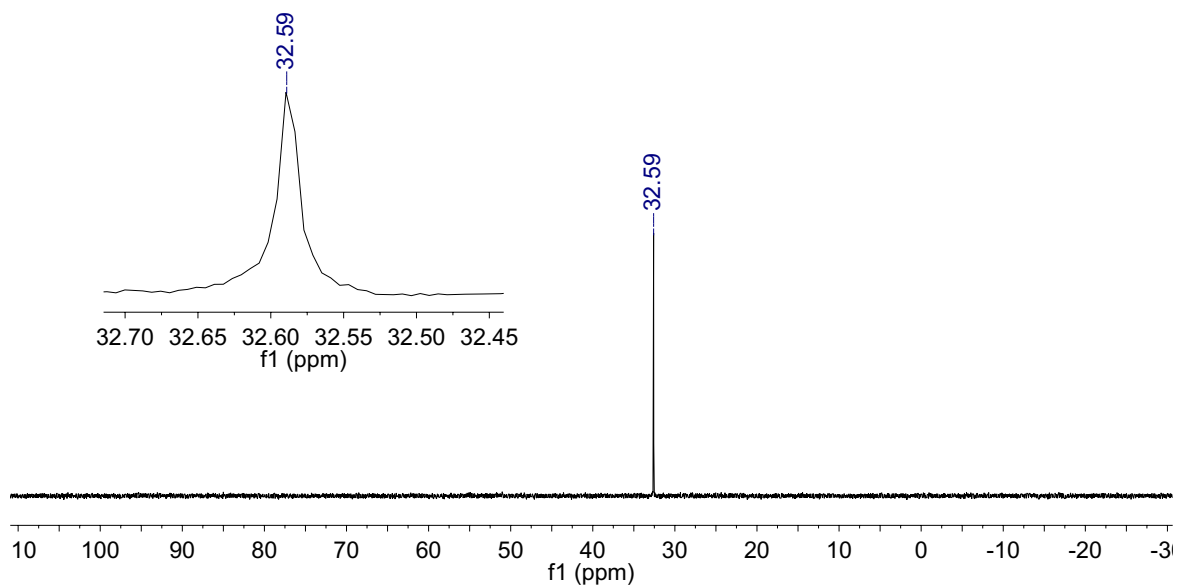

**Supplementary Fig. 8.** <sup>31</sup>P NMR spectrum of 2<sup>TPP</sup> in d<sub>6</sub>-acetone (202 MHz, 300 K).

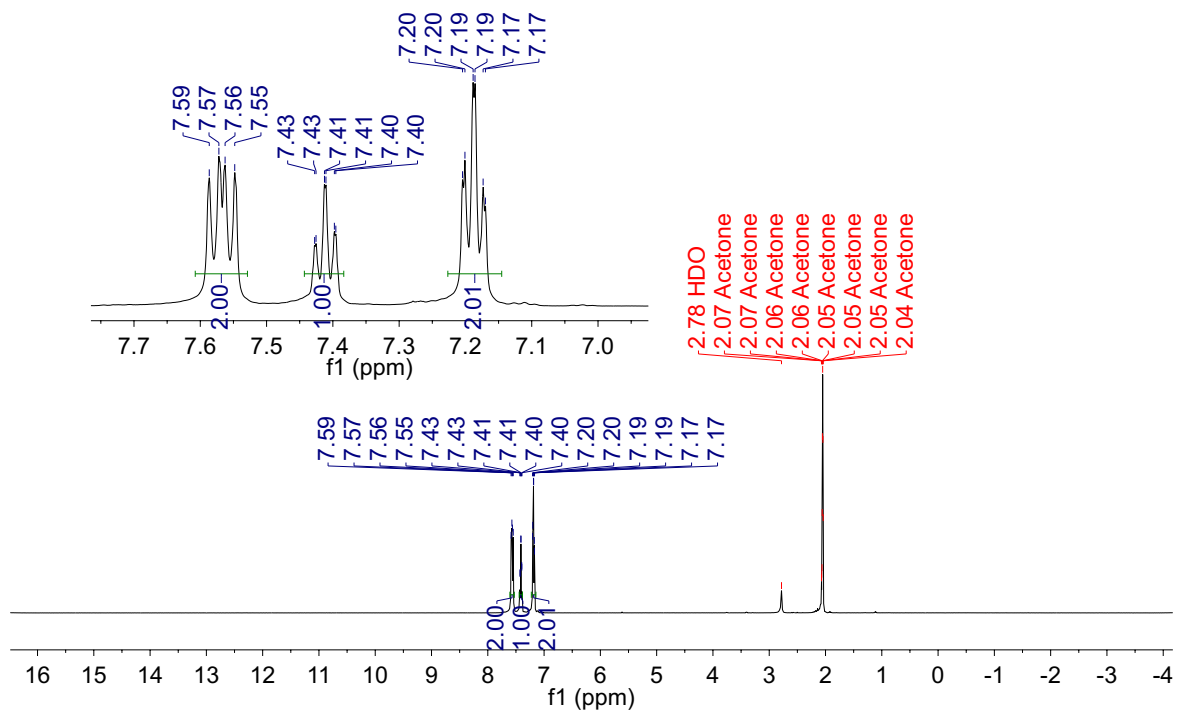

Supplementary Fig. 9.  $^1\text{H}$  NMR spectrum of  $2^{\text{TPP}}$  in  $d_6$ -acetone (500 MHz, 300 K).

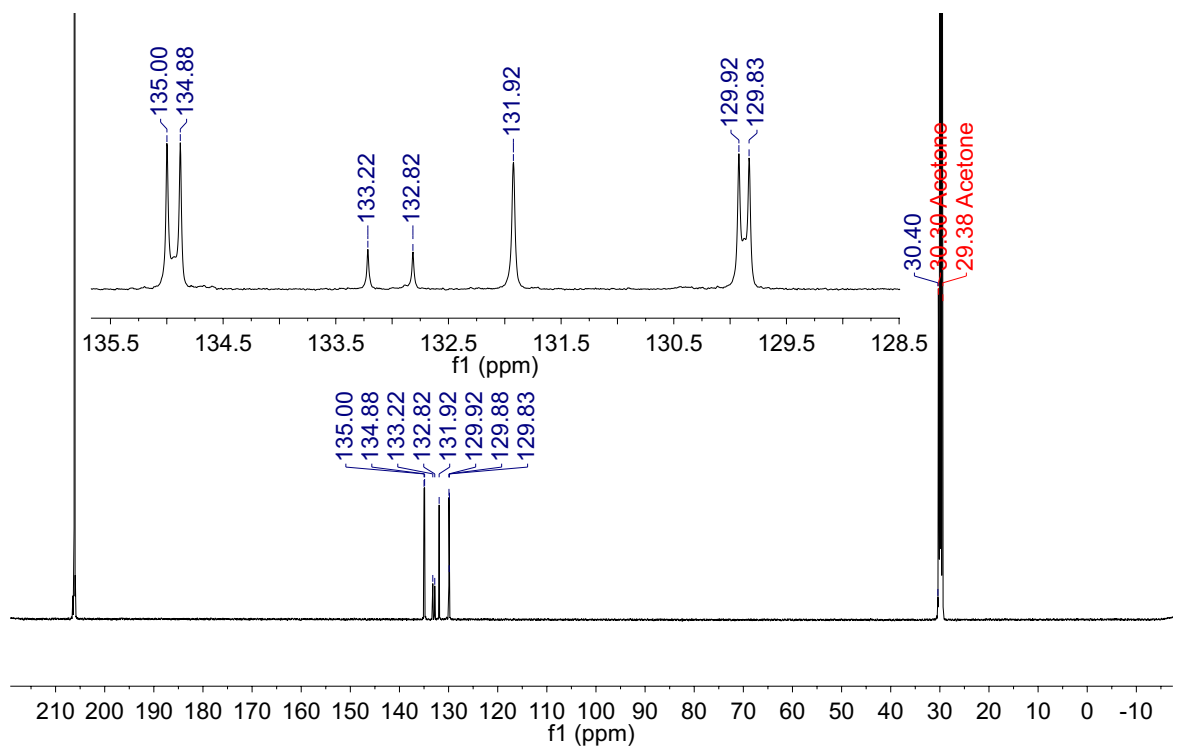

Supplementary Fig. 10.  $^{13}\text{C}$  NMR spectrum of  $2^{\text{TPP}}$  in  $d_6$ -acetone (126 MHz, 300 K).



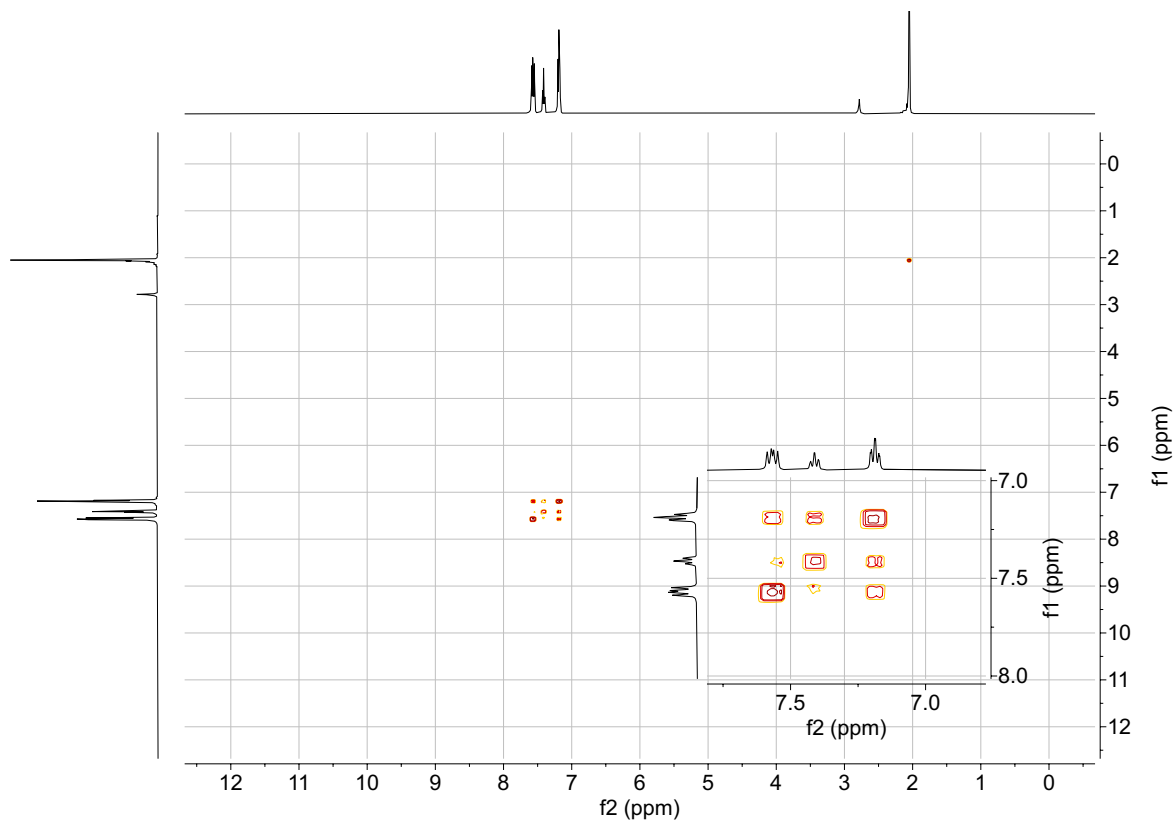

Supplementary Fig. 11.  $^1\text{H}$ - $^1\text{H}$  COSY NMR spectrum of  $2^{\text{TPP}}$  in  $d_6$ -acetone (300 K).

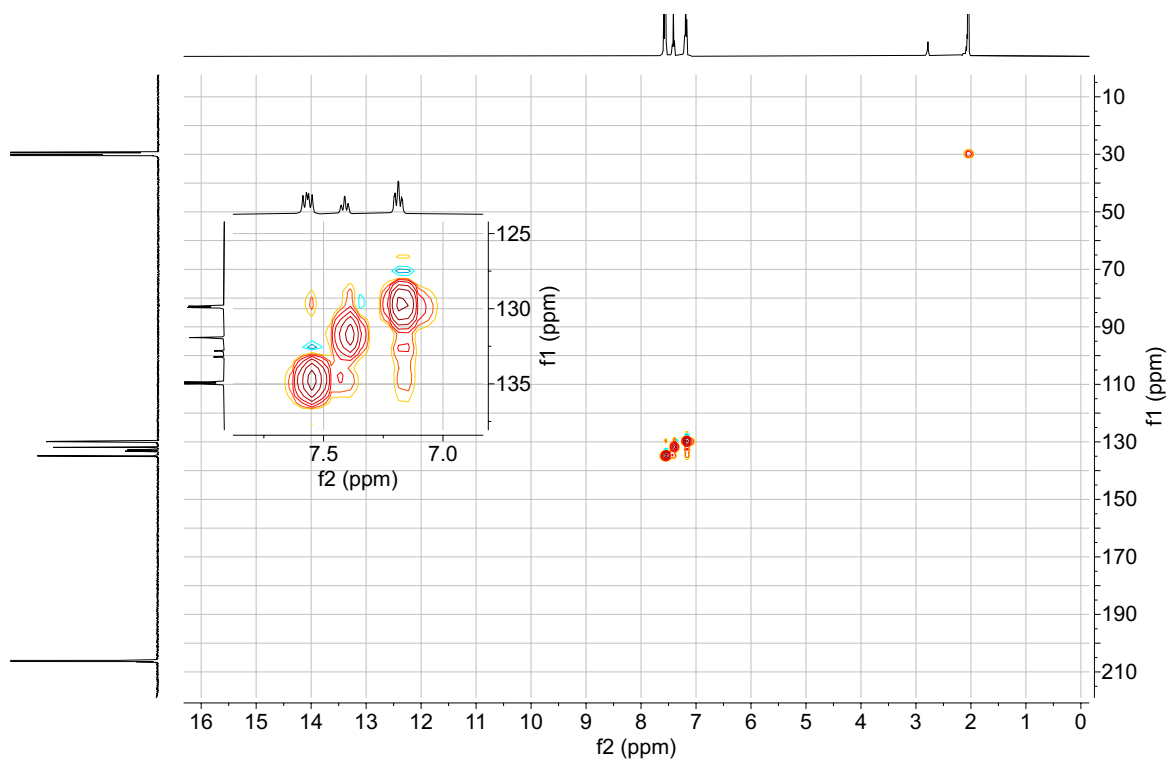

Supplementary Fig. 12.  $^{13}\text{C}$ - $^1\text{H}$  HSQC NMR spectrum of  $2^{\text{TPP}}$  in  $d_6$ -acetone (300 K).

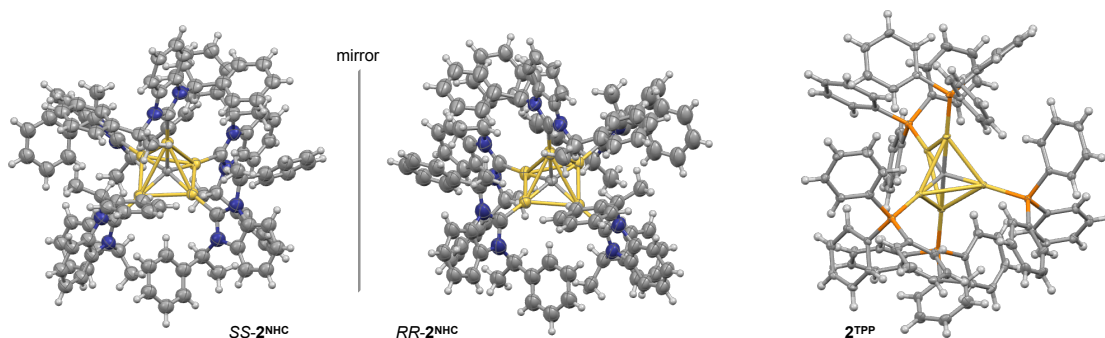

**Supplementary Fig. 13.** Single-crystal X-ray structures of cationic parts in  $SS-2^{NHC}$ ,  $RR-2^{NHC}$  and  $2^{TPP}$  at the 50% thermal ellipsoid probability. Colour code: Au, yellow; C, grey; N, blue; P, orange; H, white.  $BF_4^-$  counterions and solvent molecules are omitted for clarity.

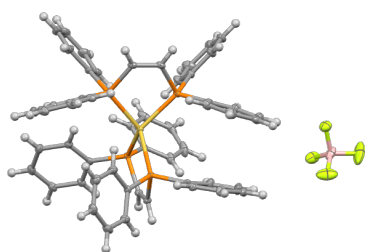

**Supplementary Fig. 14.** Single-crystal X-ray structure of **3** at the 50% thermal ellipsoid probability. Colour code: Au, yellow; C, grey; N, blue; B, pink; F, lime; P, orange; H, white. This SCXRD data is consistent with the reported data<sup>4</sup>.

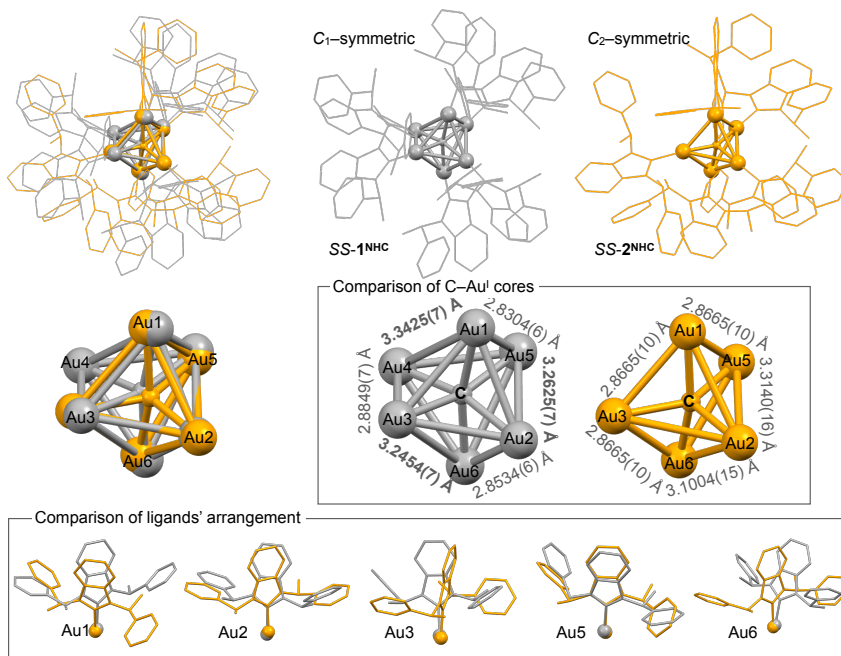

**Supplementary Fig. 15.** Comparison of the single-crystal structures of  $SS-2^{NHC}$  (orange) and  $SS-1^{NHC}$  (grey).

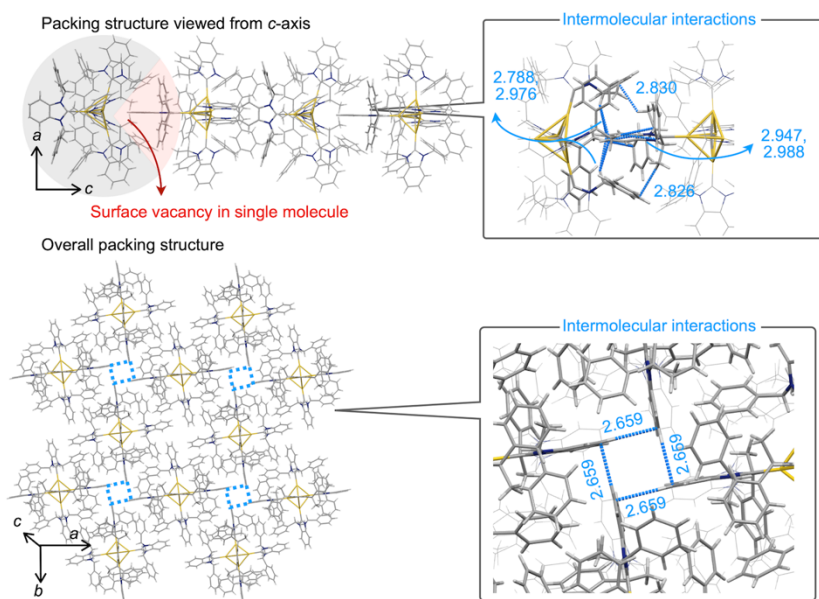

**Supplementary Fig. 16.** The intermolecular interactions found in the packing structures of  $SS-2^{NHC}$ .

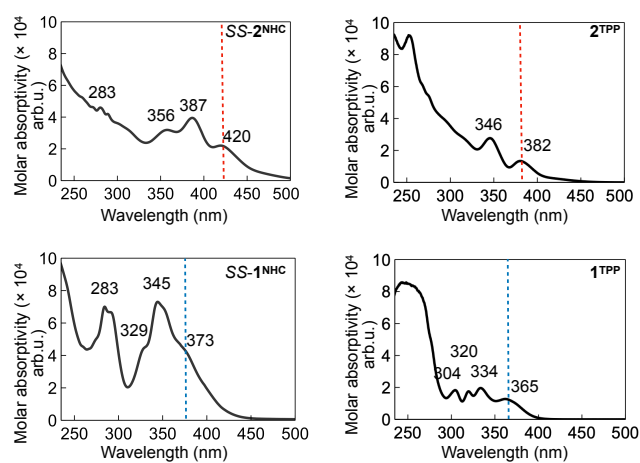

**Supplementary Fig. 17.** UV-vis absorption spectra, plotted as the molar absorptivity of  $SS-2^{NHC}$ ,  $2^{TPP}$ ,  $SS-1^{NHC}$  and  $1^{TPP}$  in  $CH_2Cl_2$  (293 K).

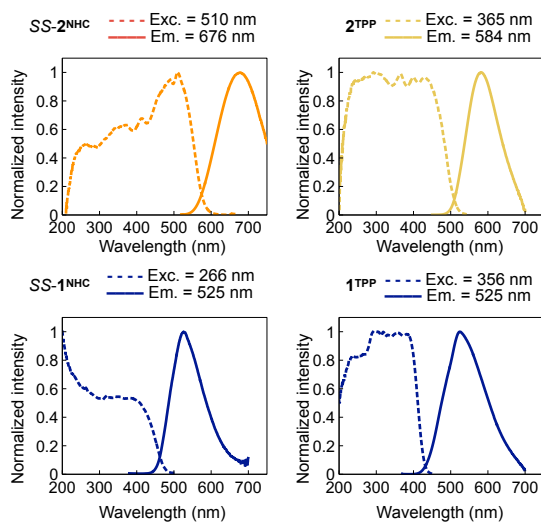

**Supplementary Fig. 18.** Excitation and emission spectra of  $SS-2^{NHC}$ ,  $2^{TPP}$ ,  $SS-1^{NHC}$  and  $1^{TPP}$  in the solid state (293 K).

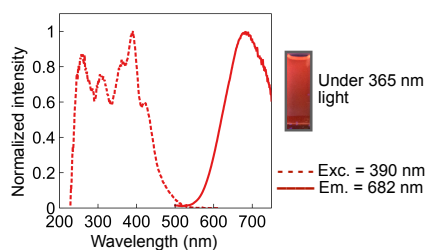

**Supplementary Fig. 19.** Emission spectra of  $SS-2^{NHC}$  in acetone, inset: photo under light irradiation at 365 nm. Once the sample of  $SS-2^{NHC}$  was dissolved, the spectrum was measured immediately (293 K).

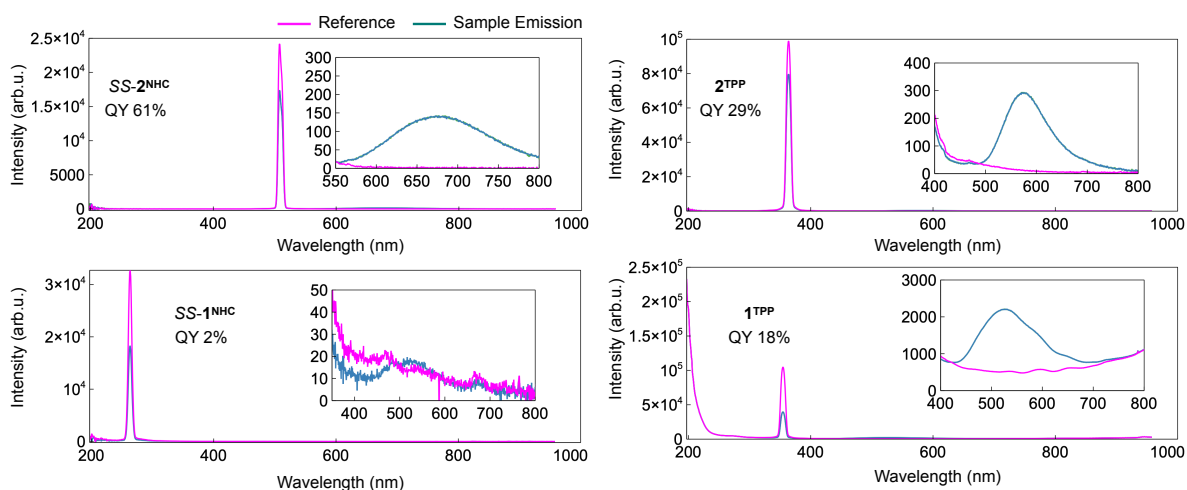

**Supplementary Fig. 20.** The absolute quantum yields (QYs) of  $SS-2^{NHC}$ ,  $2^{TPP}$ ,  $SS-1^{NHC}$  and  $1^{TPP}$  in the solid state.

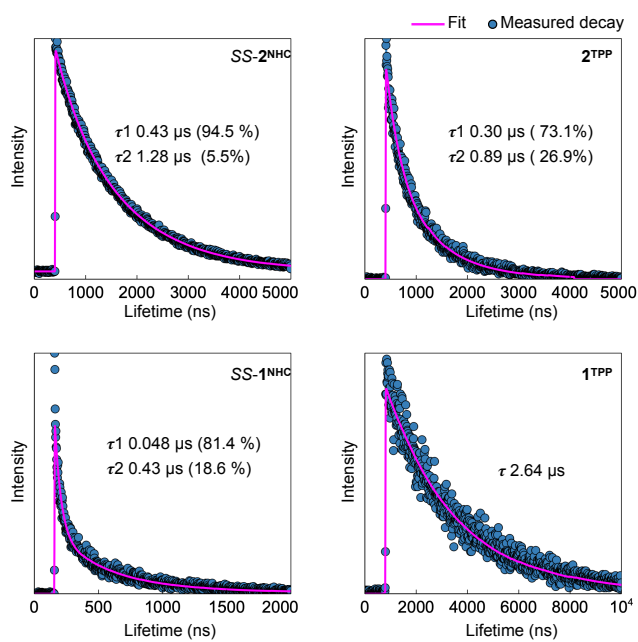

**Supplementary Fig. 21.** Lifetimes of  $SS-2^{NHC}$ ,  $2^{TPP}$ ,  $SS-1^{NHC}$  and  $1^{TPP}$  in the solid state.

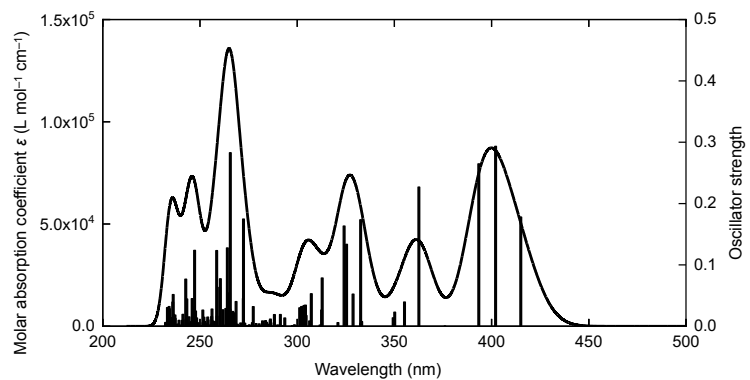

**Supplementary Fig. 22.** TD-DFT calculated UV-vis absorption spectrum of **SS-2<sup>NHC</sup>** in CH<sub>2</sub>Cl<sub>2</sub>.

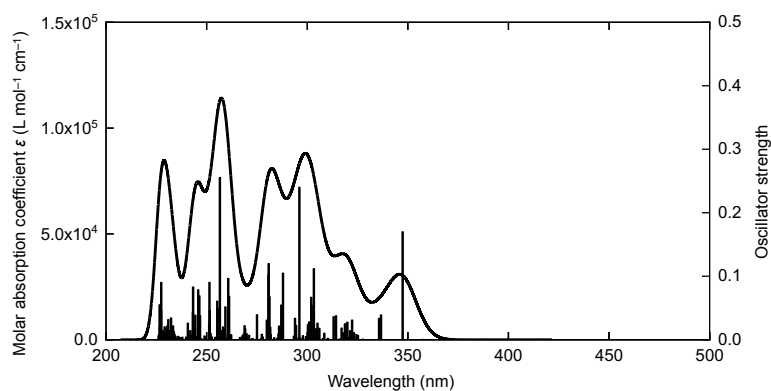

**Supplementary Fig. 23.** TD-DFT calculated UV-vis absorption spectrum of **2<sup>TPP</sup>** in CH<sub>2</sub>Cl<sub>2</sub>.

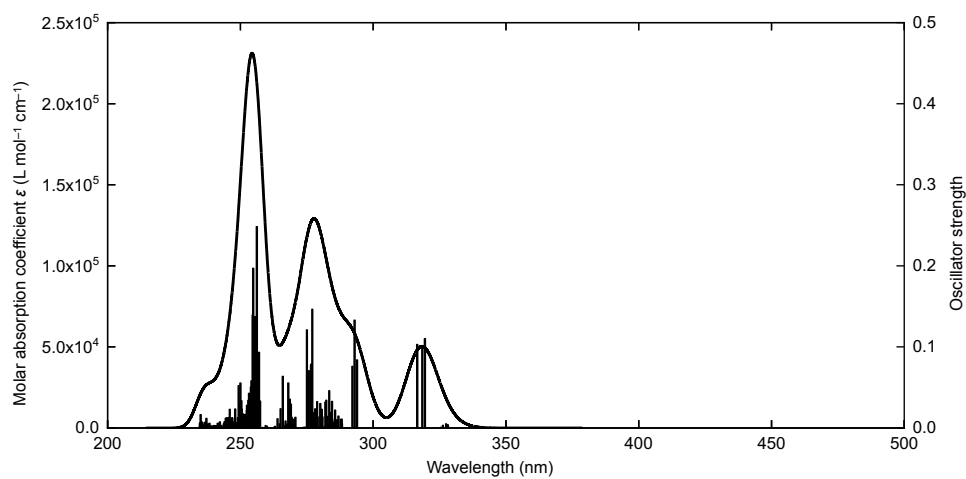

**Supplementary Fig. 24.** TD-DFT calculated UV-vis absorption spectrum of **1<sup>TPP</sup>** in CH<sub>2</sub>Cl<sub>2</sub>.

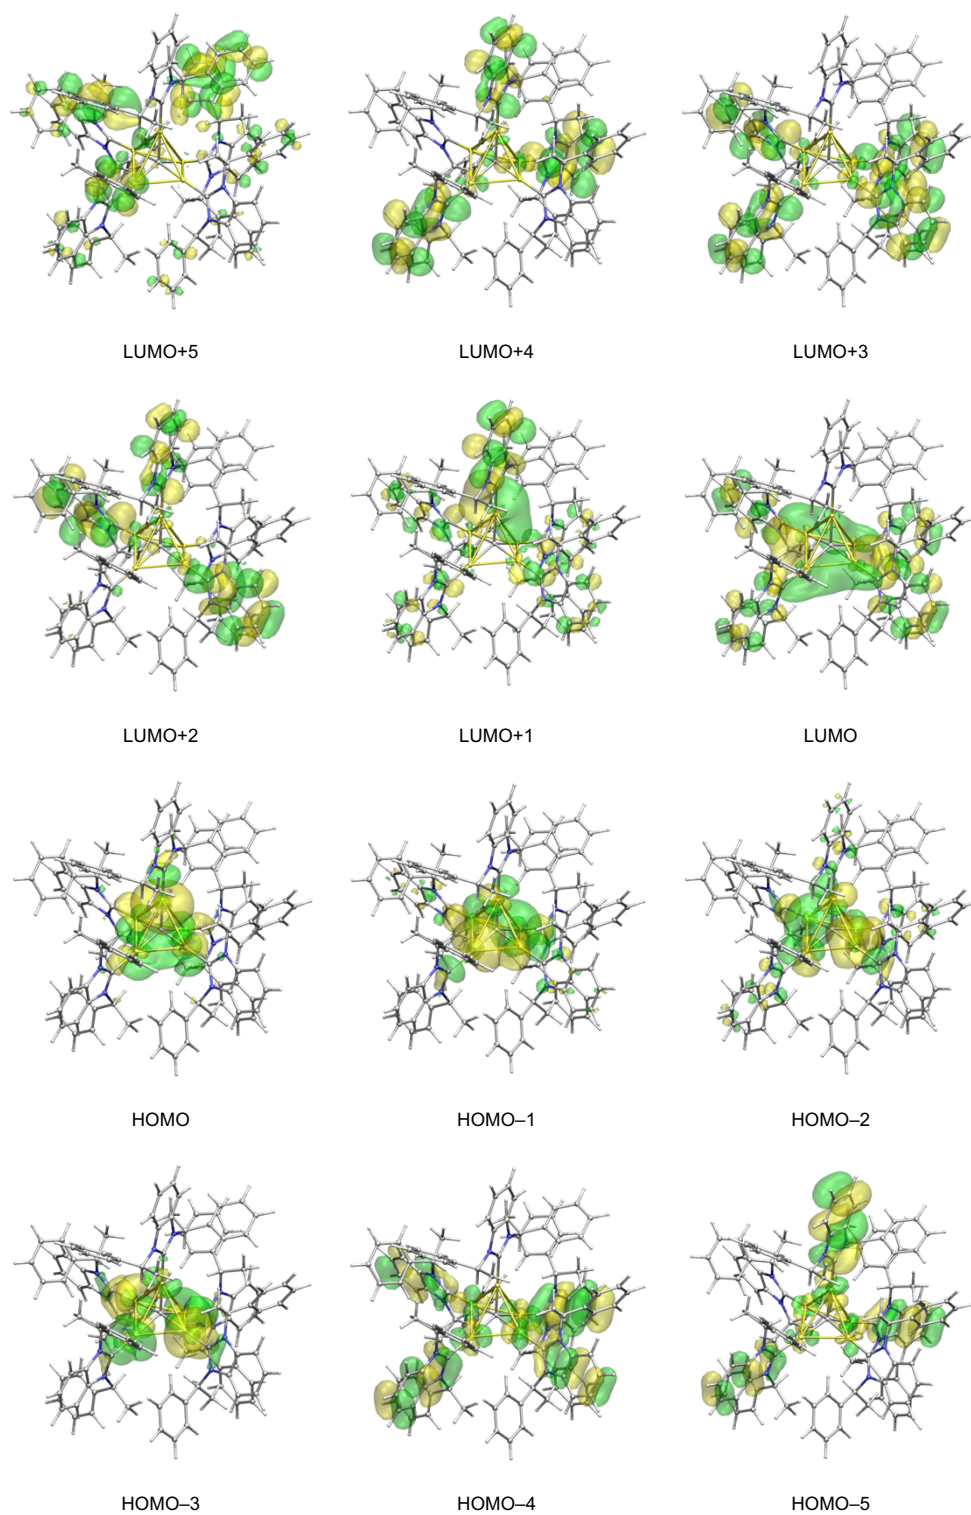

**Supplementary Fig. 25.** The frontier molecular orbitals in  $SS-2^{\text{NHC}}$  calculated by DFT.

Yellow and green represent different phases of molecular orbitals. Colour code for atoms: Au, yellow; C, grey; N, blue; H, white.

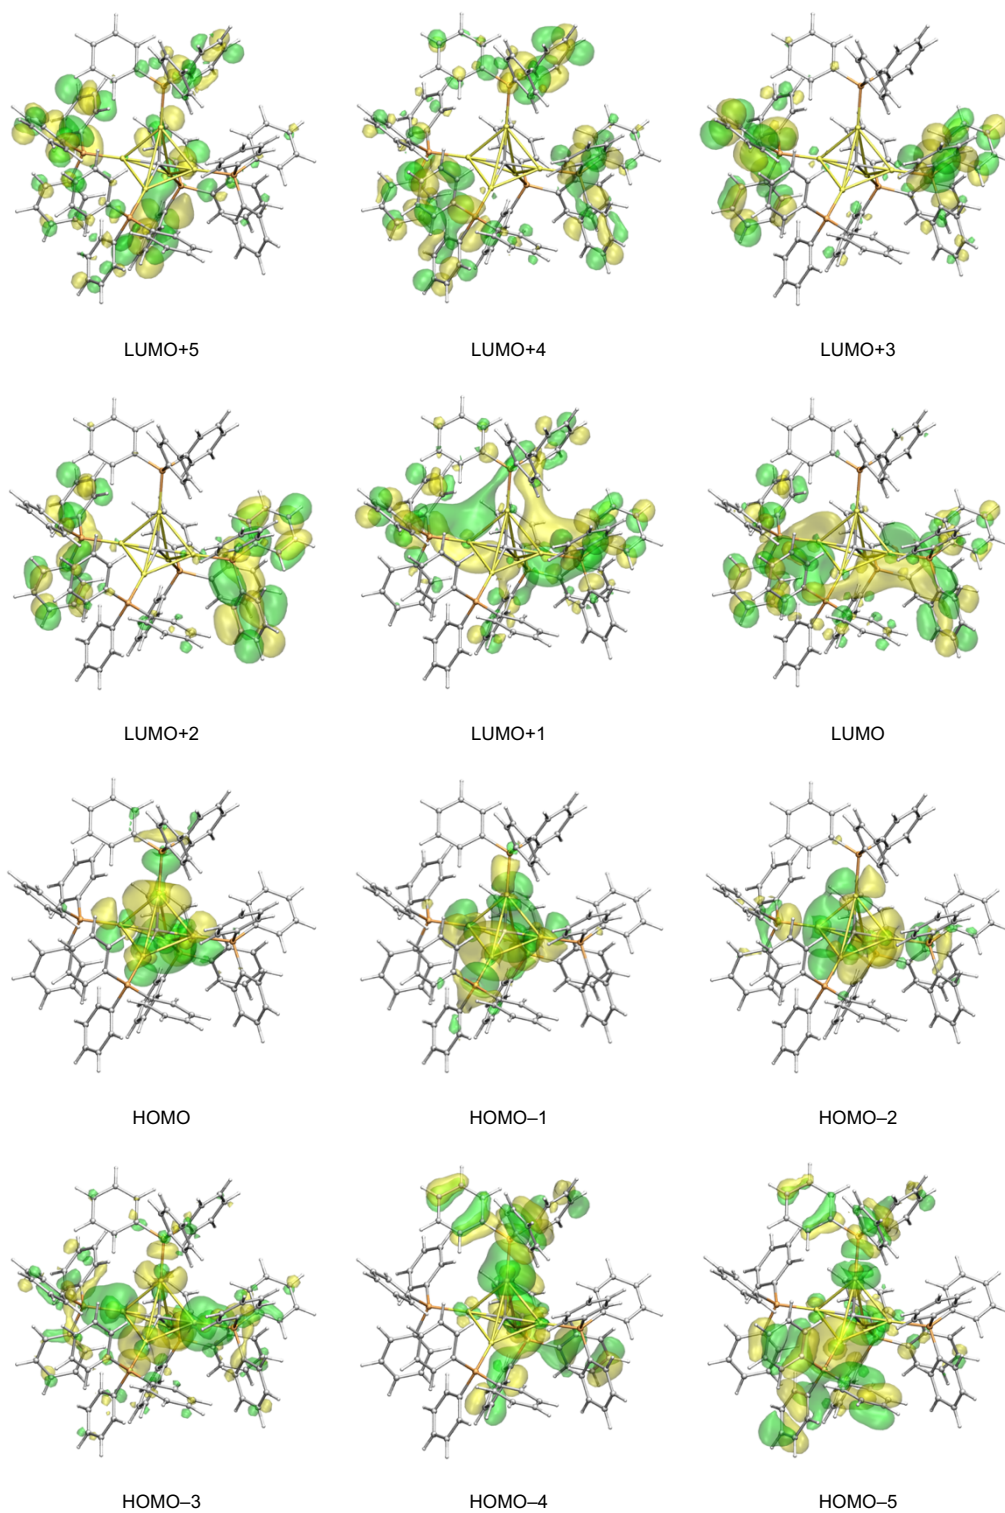

**Supplementary Fig. 26.** The frontier molecular orbitals in  $2^{TPP}$  calculated by DFT.

Yellow and green represent different phases of molecular orbitals. Colour code for atoms: Au, yellow; C, grey; P, orange; H, white.



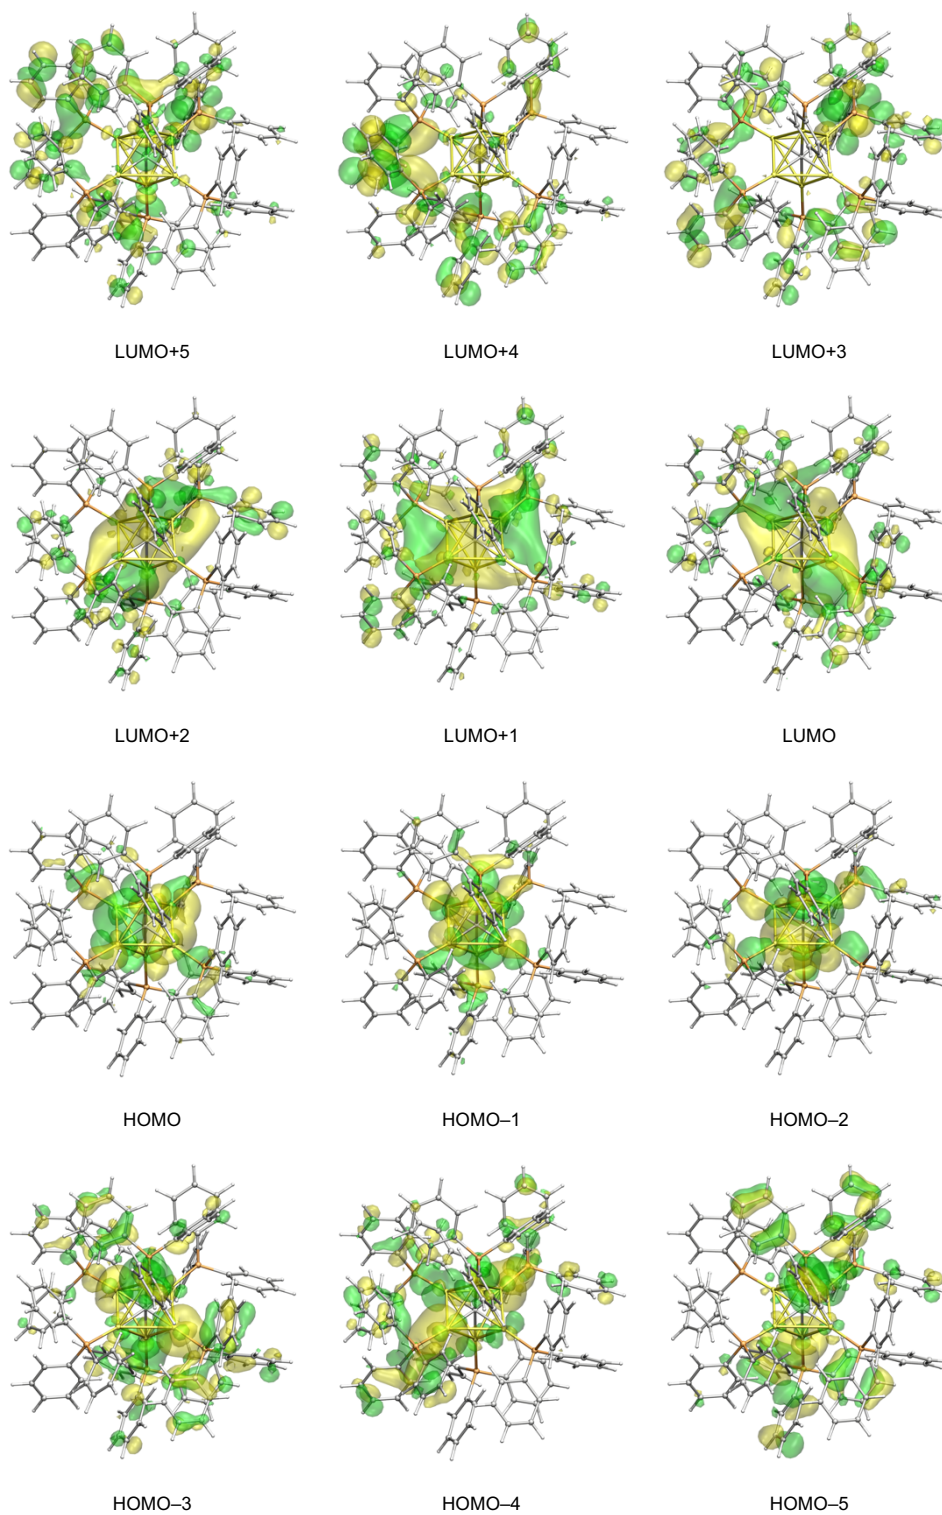

**Supplementary Fig. 27.** The frontier molecular orbitals in  $1^{TPP}$  calculated by DFT.

Yellow and green represent different phases of molecular orbitals. Colour code for atoms: Au, yellow; C, grey; P, orange; H, white.

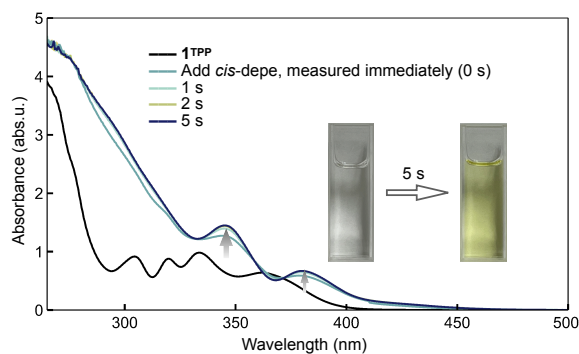

**Supplementary Fig. 28.** Time-course UV-vis absorption spectra of the etching reaction of  $1^{TPP}$  ( $c = 5 \times 10^{-5}$  M, 293 K) using *cis*-depe in dichloromethane. Insets: photographs: photographs of the reaction solution under ambient light irradiation at the beginning and after 5 s.

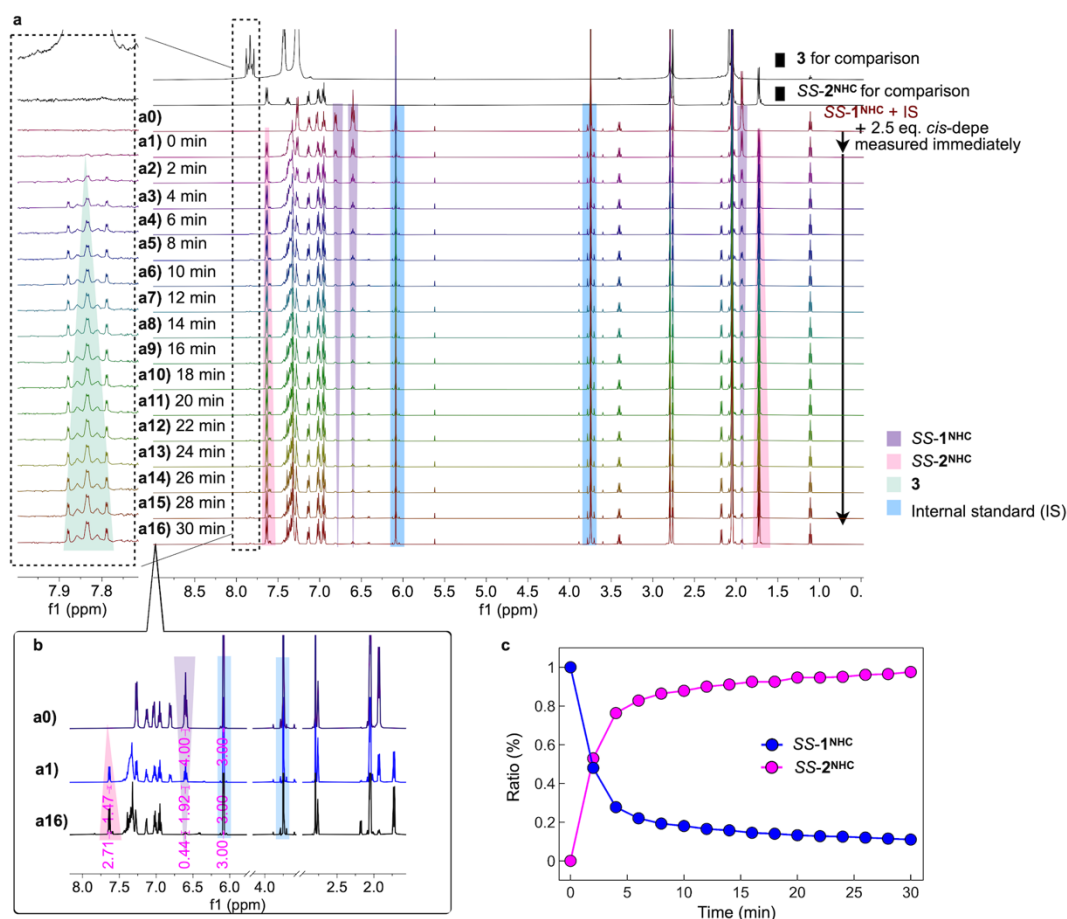

**Supplementary Fig. 29.** Time-course  $^1\text{H}$  NMR spectra of  $\text{SS-1}^{\text{NHC}}$  etched with *cis*-depe ( $d_6$ -acetone, 300 K). **a** Time-course  $^1\text{H}$  NMR spectra: a0)  $\text{SS-1}^{\text{NHC}}$  (3.3 mg, 1  $\mu\text{mol}$ ) with internal standard (IS, 1,3,5-trimethoxybenzene, 6 equiv., 6  $\mu\text{mol}$ ), a1) adding the solution of *cis*-depe (2.5 equiv.,  $3.3 \times 10^{-2}$  M, 75  $\mu\text{L}$ ) in  $d_6$ -acetone into a0, and measured immediately, a2–a16)  $^1\text{H}$  NMR spectra of this reaction recorded in intervals of 2 min. **b**  $^1\text{H}$  NMR spectra of a0, a1, and a16 with integration. **c** The ratio of remaining

$SS-1^{NHC}$  (blue) and the yield of  $SS-2^{NHC}$  (magenta) according to the spectra in a.

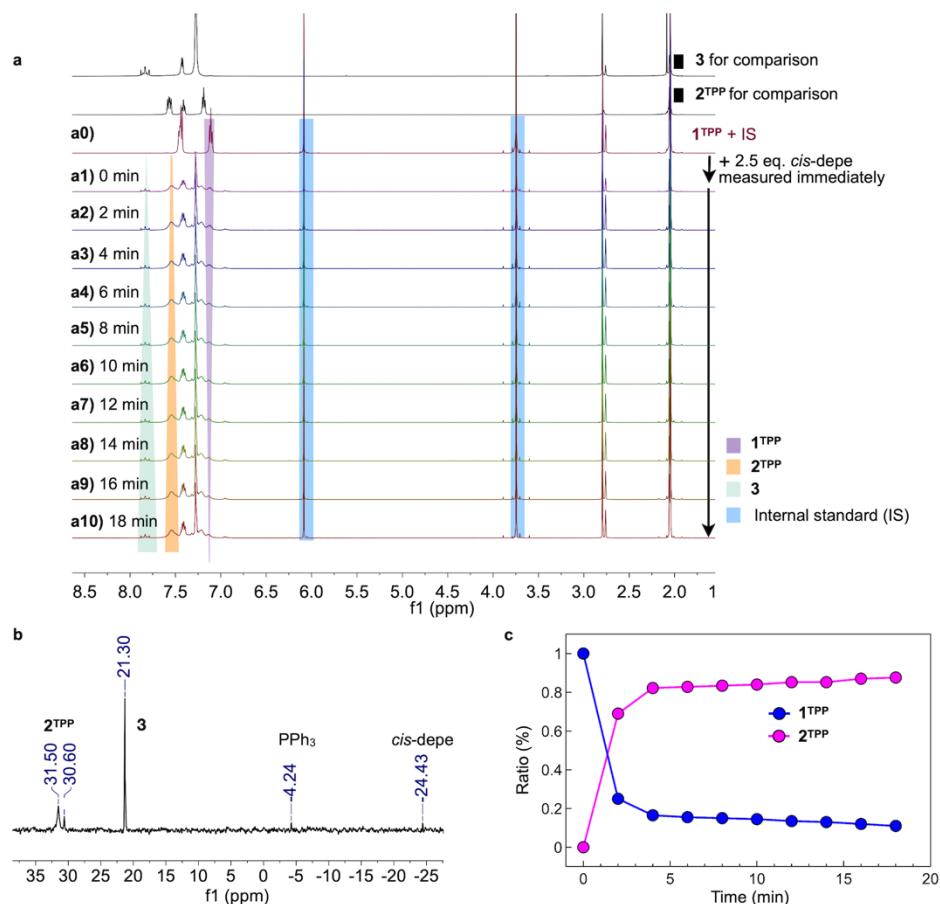

**Supplementary Fig. 30.** Time-course  $^1\text{H}$  NMR spectra of  $1^{TPP}$  etched with *cis*-depe ( $d_6$ -acetone, 300 K). **a** Time-course  $^1\text{H}$  NMR spectra: a0)  $1^{TPP}$  (2.9 mg, 1  $\mu\text{mol}$ ) with internal standard (IS, 1,3,5-trimethoxybenzene, 6 equiv., 6  $\mu\text{mol}$ ), a1) adding the solution of *cis*-depe (2.5 equiv.,  $3.3 \times 10^{-2}$  M, 75  $\mu\text{L}$ ) in  $d_6$ -acetone into a0, and measured immediately, a2–a10)  $^1\text{H}$  NMR spectra of this reaction recorded at intervals of 2 min. **b**  $^{31}\text{P}$  NMR spectrum ( $d_6$ -acetone, 300 K) after 18 min, slightly shifted signals in this mixed reaction compared with the corresponding pure compounds:  $2^{TPP}$  (observed  $\delta$  31.5 ppm, pure  $\delta$  32.6 ppm),  $3$  (observed  $\delta$  21.3 ppm, pure  $\delta$  22.4 ppm),  $\text{PPh}_3$  (observed  $\delta$  -4.2 ppm, pure  $\delta$  -5.5 ppm). **c** The ratio of remaining  $1^{TPP}$  (blue) and the yield of  $2^{TPP}$  (magenta) according to the spectra in a.

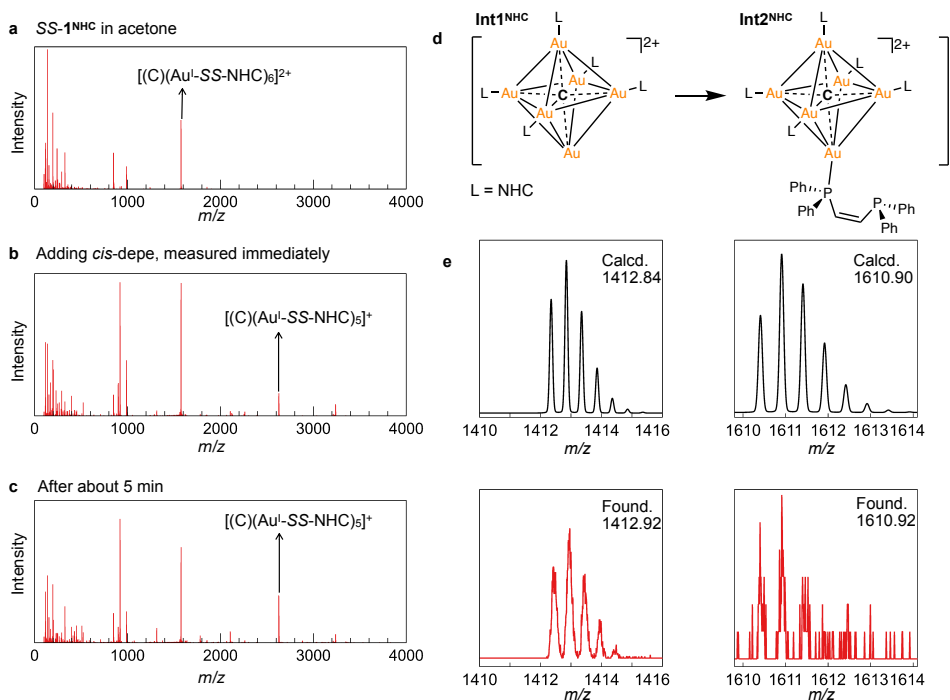

**Supplementary Fig. 31.** The ESI-MS spectra of monitoring the reaction of  $SS-1^{NHC}$  etched with *cis*-depe. **a-c** The ESI-MS results. **d** The proposed intermediates. **e** The simulated isotope patterns of  $Int1^{NHC}$  and  $Int2^{NHC}$  and the corresponding experimental results.

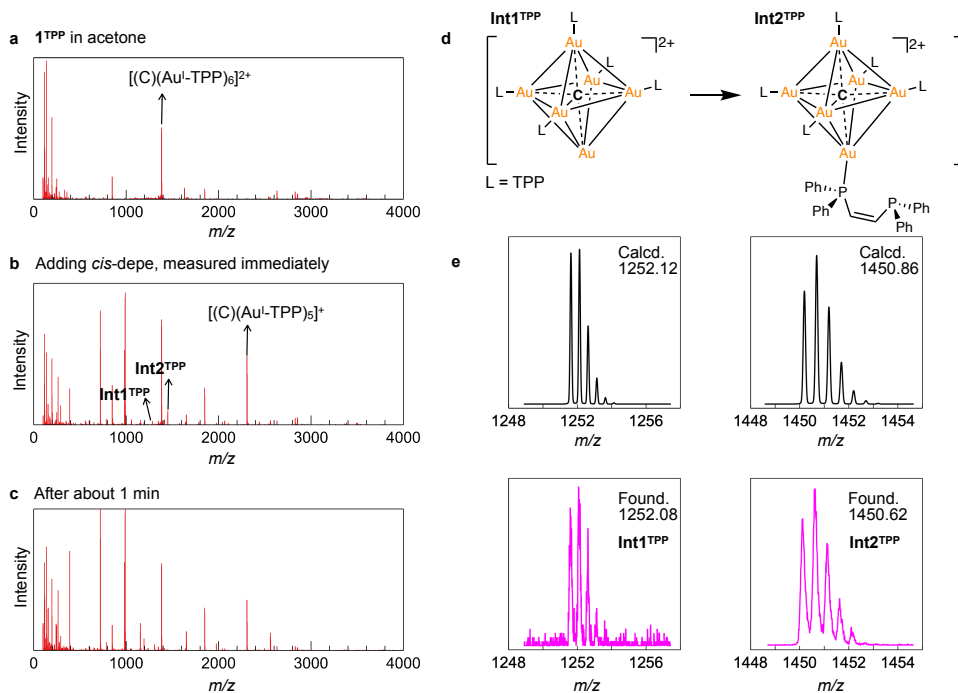

**Supplementary Fig. 32.** The ESI-MS spectra of monitoring the reaction of  $1^{TPP}$  and *cis*-depe. **a-c** The ESI-MS results. **d** The proposed intermediates. **e** The simulated isotope patterns of  $Int1^{TPP}$  and  $Int2^{TPP}$ , and the corresponding experimental results.

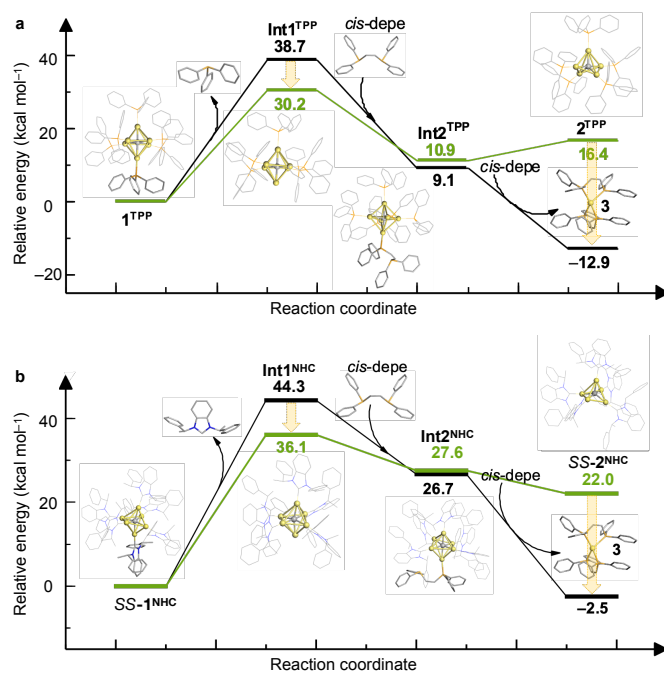

**Supplementary Fig. 33.** Calculated energy profiles for the proposed etching mechanism. **a** The energy profiles of etching  $1^{\text{TPP}}$  with *cis*-depe (the green lines are relative energies in the solvent of the dichloromethane phase, and the black lines represent relative energies in the gas phase). **b** The energy profiles of etching  $SS-1^{\text{NHC}}$  with *cis*-depe (the green lines are relative energies in the solvent of the dichloromethane phase, and the black lines represent relative energies in the gas phase). The above results indicate the different phases in dichloromethane and gas are critical in affecting the relative energies. The theoretical results are consistent with the experimental results that the  $\text{CAu}^{\text{I}}_5$  clusters ( $SS-2^{\text{NHC}}$  and  $2^{\text{TPP}}$ ) are very stable in the solid state, but less stable in dichloromethane. The spin states of all the involved species are the singlet state.

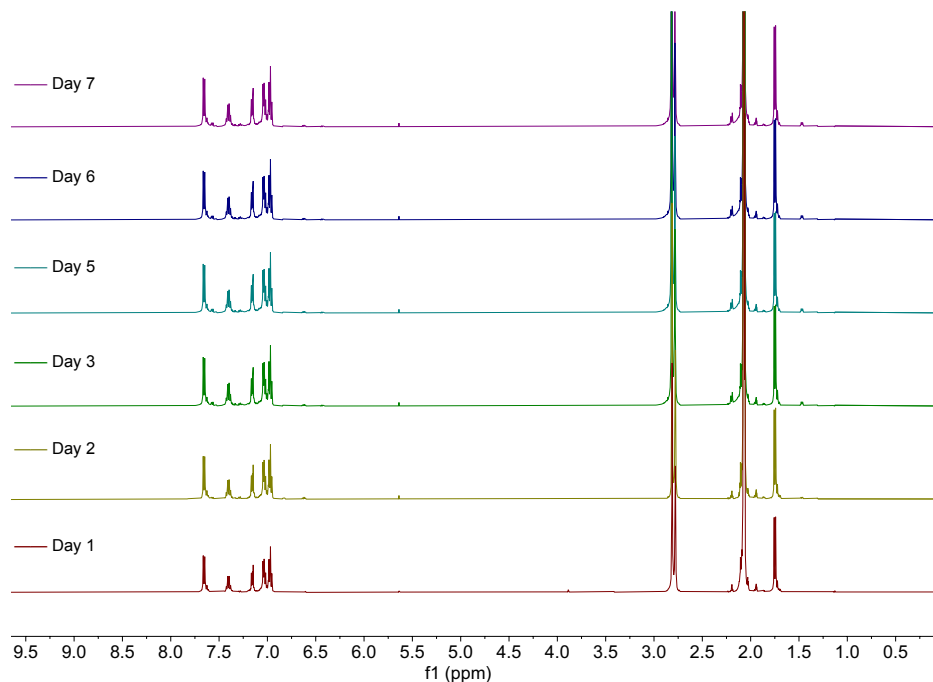

**Supplementary Fig. 34.**  $^1\text{H}$  NMR spectra showing stability studies of  $\text{SS-2}^{\text{NHC}}$  in  $d_6$ -acetone for one week. Small signals (\*) from  $\text{SS-1}^{\text{NHC}}$  can be observed.

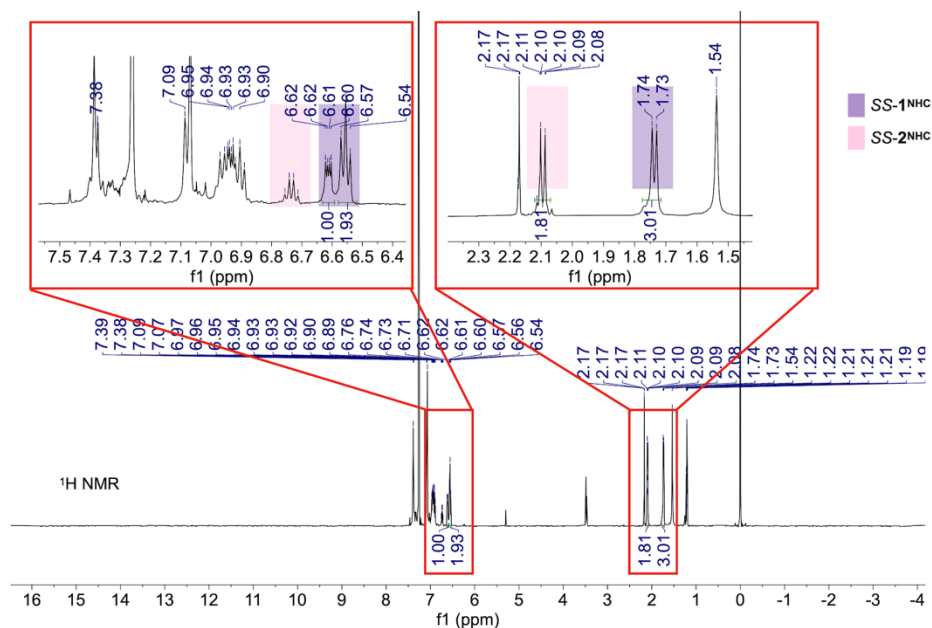

**Supplementary Fig. 35.**  $^1\text{H}$  NMR spectrum of  $\text{SS-2}^{\text{NHC}}$  in  $\text{CDCl}_3$  (500 M, 300 K). Once the crystal of  $\text{SS-2}^{\text{NHC}}$  was dissolved in  $\text{CDCl}_3$ , the spectrum was immediately measured. Based on the ratio of  $-\text{CH}_3$  groups in  $\text{SS-1}^{\text{NHC}}$  and  $\text{SS-2}^{\text{NHC}}$ , the ratio of  $\text{SS-1}^{\text{NHC}}$  to  $\text{SS-2}^{\text{NHC}}$  is calculated as 1.4.

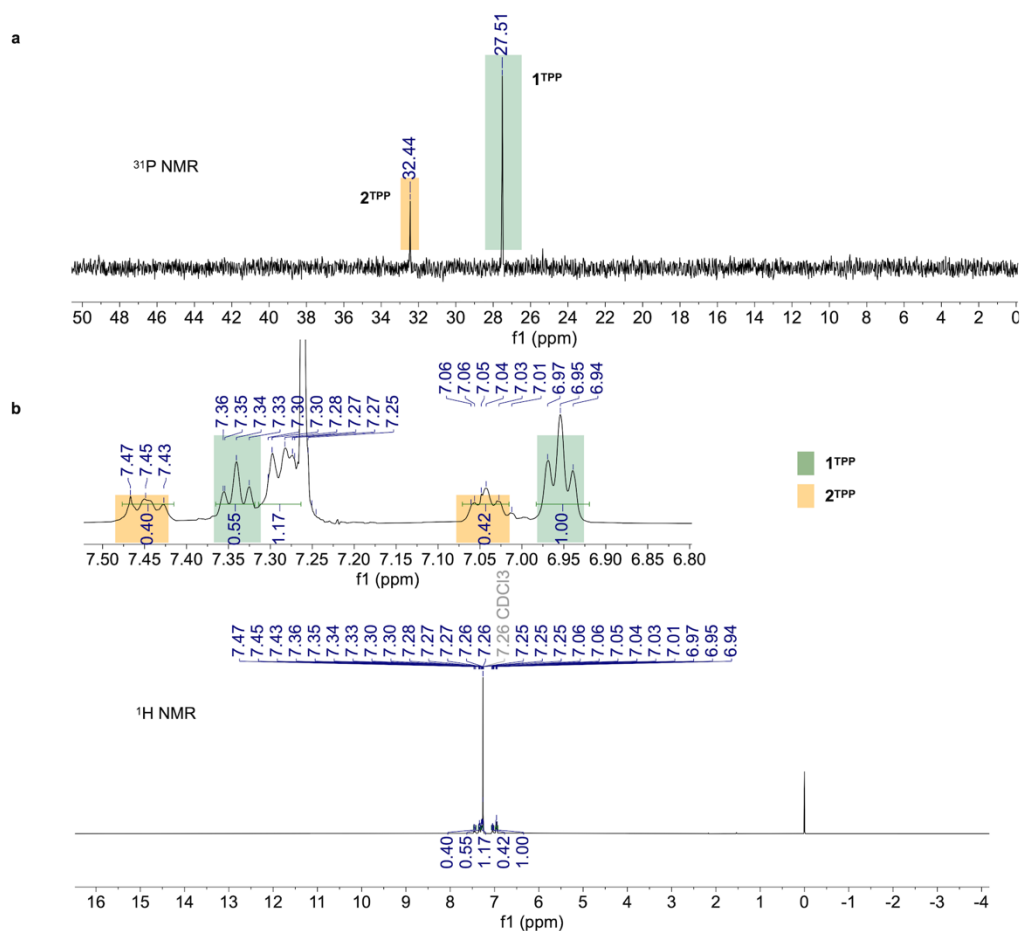

**Supplementary Fig. 36.**  $^{31}\text{P}$  NMR and  $^1\text{H}$  NMR spectra of crystalline  $2^{\text{TPP}}$  in  $\text{CDCl}_3$  (300 K). Once the crystal of  $2^{\text{TPP}}$  was dissolved in  $\text{CDCl}_3$ , the spectra were immediately measured. **a**  $^{31}\text{P}$  NMR spectrum (202 M, 300 K) showing signals from  $1^{\text{TPP}}$  and  $2^{\text{TPP}}$ . **b**  $^1\text{H}$  NMR spectrum (500 M, 300 K), based on the ratio of Ph groups in  $1^{\text{TPP}}$  and  $2^{\text{TPP}}$ , the ratio of  $1^{\text{TPP}}$  to  $2^{\text{TPP}}$  is calculated as 2.1.

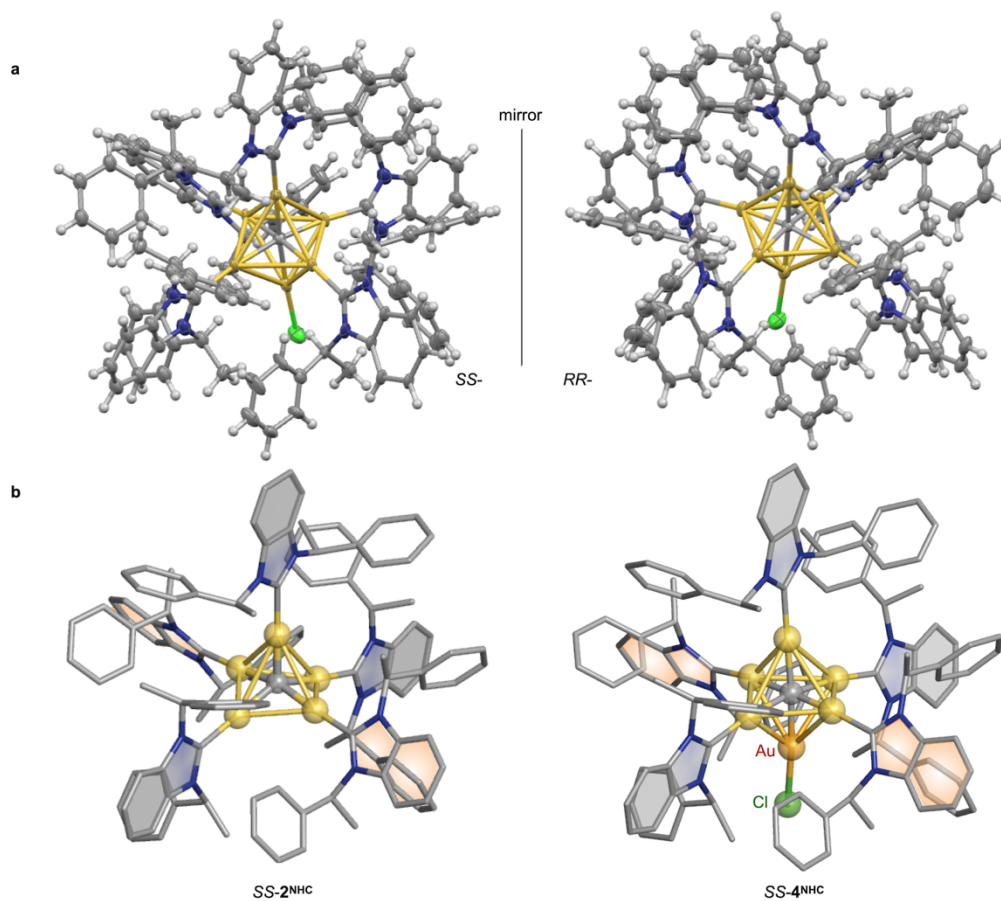

**Supplementary Fig. 37.** Single-crystal X-ray structures of the Cl-coordinated  $\text{CAu}^{\text{I}}_6$  clusters. **a** Cationic parts in  $\text{SS-4}^{\text{NHC}}$  and  $\text{RR-4}^{\text{NHC}}$  at the 50% thermal ellipsoid probability. **b** Comparison of cations between  $\text{SS-2}^{\text{NHC}}$  and  $\text{SS-4}^{\text{NHC}}$ . Colour code: Au, yellow; C, grey; N, blue; P, orange; H, white; Cl, green.  $\text{BF}_4^-$  and solvent molecules are omitted for clarity.



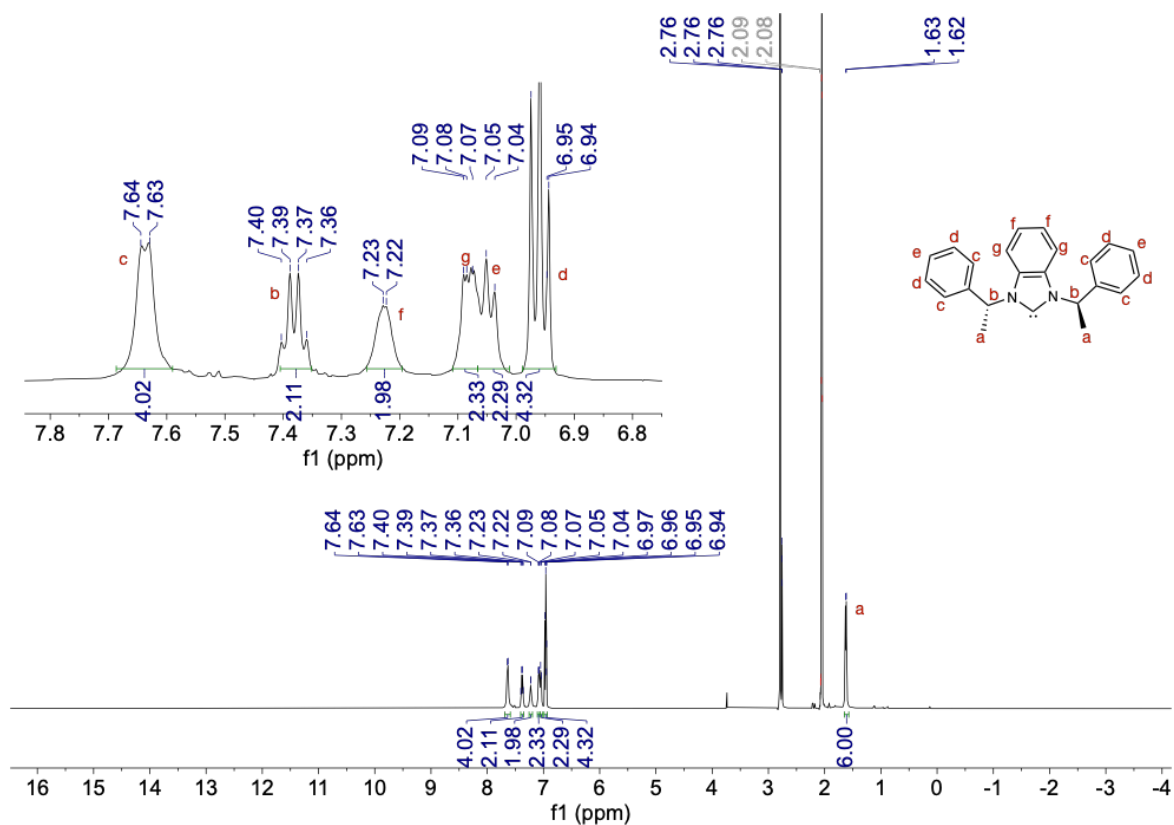

**Supplementary Fig. 38.**  $^1\text{H}$  NMR spectrum of SS-4<sup>NHC</sup> in  $d_6$ -acetone (500 MHz, 300 K).

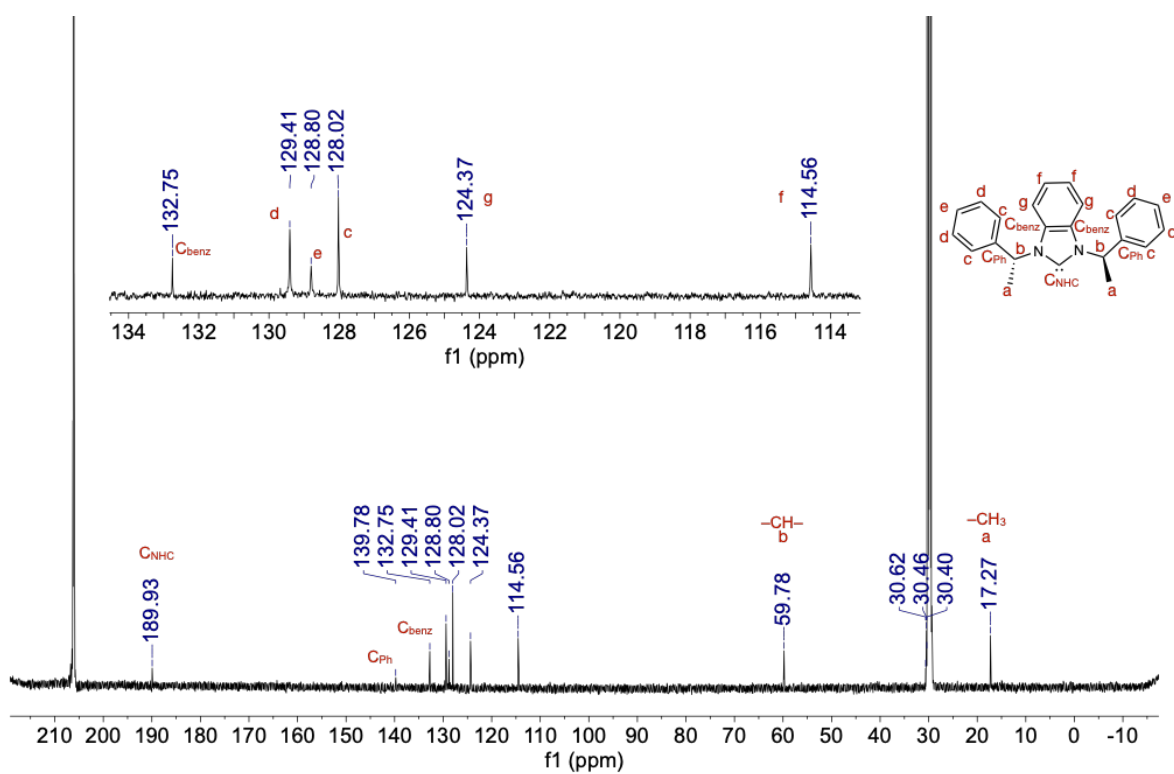

**Supplementary Fig. 39.**  $^{13}\text{C}$  NMR spectrum of SS-4<sup>NHC</sup> in  $d_6$ -acetone (126 MHz, 300 K).

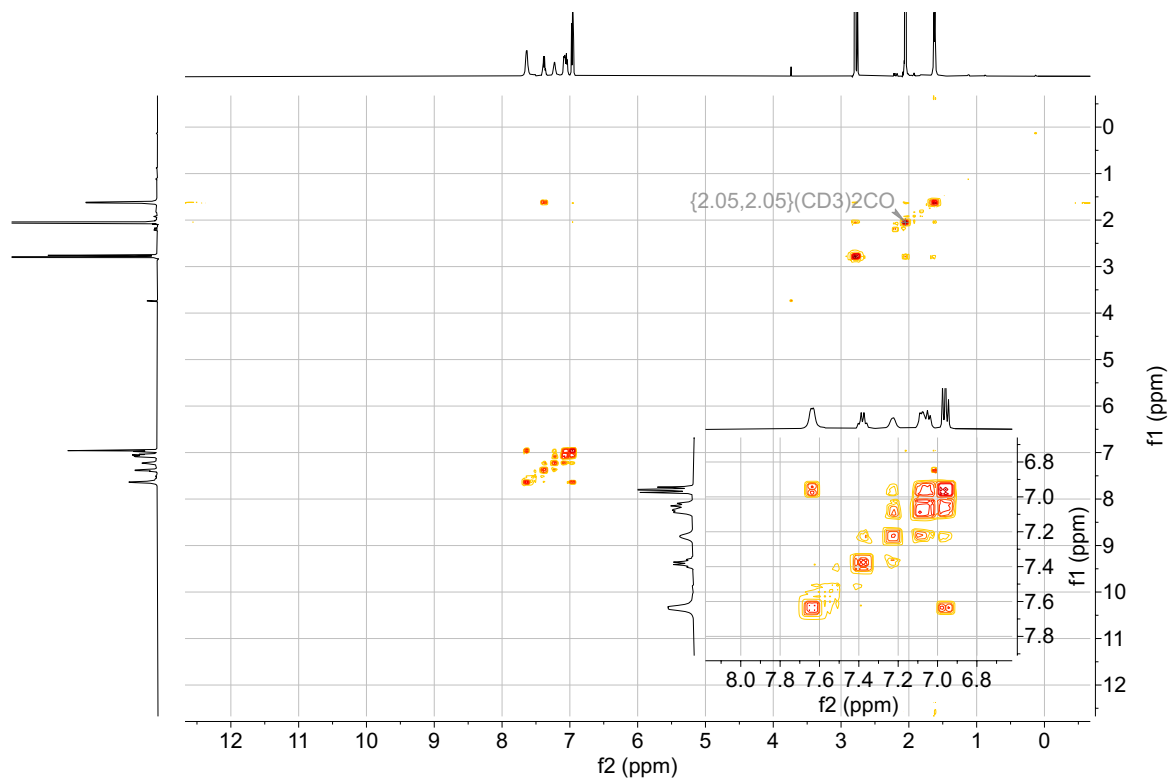

Supplementary Fig. 40.  $^1\text{H}$ - $^1\text{H}$  COSY NMR spectrum of  $\text{SS-4}^{\text{NHC}}$  in  $d_6$ -acetone (300 K).

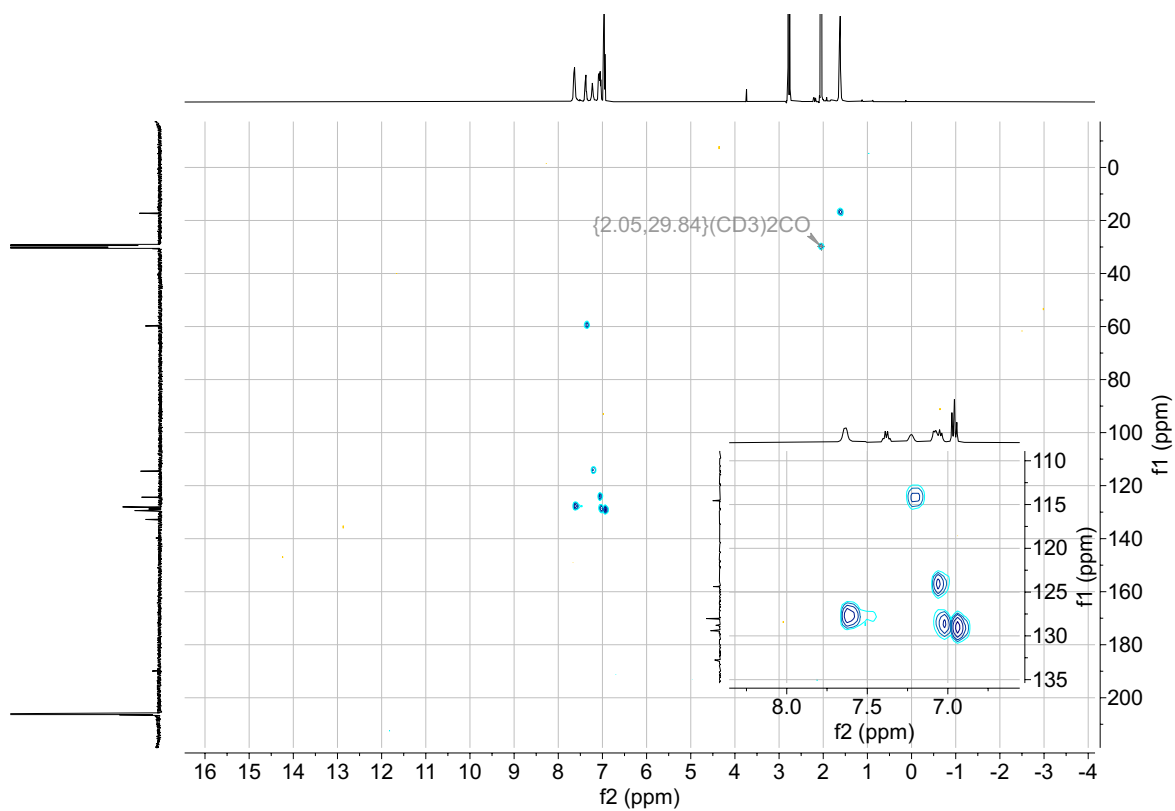

Supplementary Fig. 41.  $^{13}\text{C}$ - $^1\text{H}$  HSQC NMR spectrum of  $\text{SS-4}^{\text{NHC}}$  in  $d_6$ -acetone (300 K).

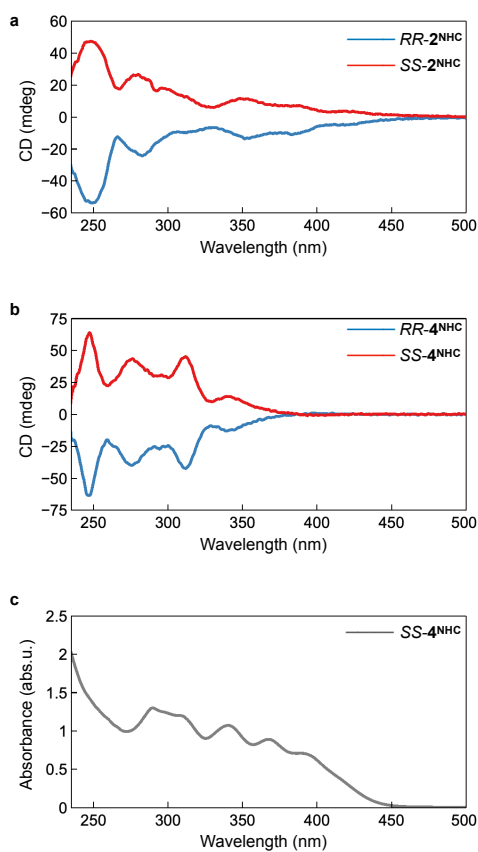

**Supplementary Fig. 42.** CD spectra of the C-centered gold(I) clusters. **a**  $SS-$  and  $RR-2^{NHC}$  in  $CH_2Cl_2$  ( $c = 20 \mu M$ , 293 K). **b**  $SS-$  and  $RR-4^{NHC}$  in  $CH_2Cl_2$ . **c** The UV-vis absorption spectrum of  $SS-4^{NHC}$  in  $CH_2Cl_2$  ( $c = 20 \mu M$ , 293 K).

## Supplementary Tables

**Supplementary Table 1.** Crystallographic data of *SS-2*<sup>NHC</sup>, *RR-2*<sup>NHC</sup> and *2*<sup>TPP</sup>.

| Identification code                                           | <i>SS-2</i> <sup>NHC</sup>                                                                                                                                      | <i>RR-2</i> <sup>NHC</sup>                                                                                                 | <i>2</i> <sup>TPP</sup>                                                                                    |
|---------------------------------------------------------------|-----------------------------------------------------------------------------------------------------------------------------------------------------------------|----------------------------------------------------------------------------------------------------------------------------|------------------------------------------------------------------------------------------------------------|
| Empirical formula                                             | C <sub>116</sub> H <sub>110</sub> Au <sub>5</sub> BF <sub>4</sub> N <sub>10</sub> ·<br>2.5(CH <sub>2</sub> Cl <sub>2</sub> )·0.5(H <sub>2</sub> O) <sup>a</sup> | C <sub>116</sub> H <sub>110</sub> Au <sub>5</sub> BF <sub>4</sub> N <sub>10</sub> ·<br>2.25(H <sub>2</sub> O) <sup>b</sup> | C <sub>91</sub> H <sub>75</sub> Au <sub>5</sub> BF <sub>4</sub> P <sub>5</sub>                             |
| Formula weight                                                | 2937.19 <sup>a</sup>                                                                                                                                            | 2756.40 <sup>b</sup>                                                                                                       | 2395.00                                                                                                    |
| Temperature (K)                                               | 93                                                                                                                                                              | 93                                                                                                                         | 93                                                                                                         |
| Crystal system                                                | tetragonal                                                                                                                                                      | tetragonal                                                                                                                 | monoclinic                                                                                                 |
| Space group                                                   | <i>I</i> 4                                                                                                                                                      | <i>I</i> 4                                                                                                                 | <i>P</i> 2 <sub>1</sub> / <i>n</i>                                                                         |
| <i>a</i> (Å)                                                  | 21.35370(10)                                                                                                                                                    | 21.07880(10)                                                                                                               | 20.0525(5)                                                                                                 |
| <i>b</i> (Å)                                                  | 21.35370(10)                                                                                                                                                    | 21.07880(10)                                                                                                               | 15.4181(5)                                                                                                 |
| <i>c</i> (Å)                                                  | 25.36310(10)                                                                                                                                                    | 25.0288(3)                                                                                                                 | 26.5756(7)                                                                                                 |
| $\alpha$ (°)                                                  | 90                                                                                                                                                              | 90                                                                                                                         | 90                                                                                                         |
| $\beta$ (°)                                                   | 90                                                                                                                                                              | 90                                                                                                                         | 96.145(2)                                                                                                  |
| $\gamma$ (°)                                                  | 90                                                                                                                                                              | 90                                                                                                                         | 90                                                                                                         |
| Volume (Å <sup>3</sup> )                                      | 11565.08(12)                                                                                                                                                    | 11120.69(17)                                                                                                               | 8169.2(4)                                                                                                  |
| <i>Z</i>                                                      | 4                                                                                                                                                               | 4                                                                                                                          | 4                                                                                                          |
| $\rho_{\text{calc}}$ (g cm <sup>-3</sup> )                    | 1.678                                                                                                                                                           | 1.644                                                                                                                      | 1.947                                                                                                      |
| $\mu$ (mm <sup>-1</sup> )                                     | 13.152                                                                                                                                                          | 12.569                                                                                                                     | 9.100                                                                                                      |
| <i>F</i> (000)                                                | 5648.0                                                                                                                                                          | 5320.0                                                                                                                     | 4528.0                                                                                                     |
| Crystal size (mm <sup>3</sup> )                               | 0.1 × 0.1 × 0.1                                                                                                                                                 | 0.1 × 0.1 × 0.1                                                                                                            | 0.2 × 0.2 × 0.2                                                                                            |
| Radiation                                                     | CuK $\alpha$ ( $\lambda$ = 1.54184)                                                                                                                             | CuK $\alpha$ ( $\lambda$ = 1.54184)                                                                                        | MoK $\alpha$ ( $\lambda$ = 0.71073)                                                                        |
| 2 $\theta$ range for data collection (°)                      | 5.41 to 144.592                                                                                                                                                 | 5.93 to 144.486                                                                                                            | 4.394 to 59.996                                                                                            |
| Index ranges                                                  | -26 ≤ <i>h</i> ≤ 26, -26 ≤ <i>k</i> ≤ 26, -29-25 ≤ <i>h</i> ≤ 26, -25 ≤ <i>k</i> ≤ 25, -30-27 ≤ <i>h</i> ≤ 26, -16 ≤ <i>k</i> ≤ 20, -33 ≤ <i>l</i> ≤ 30         | -26 ≤ <i>h</i> ≤ 26, -25 ≤ <i>k</i> ≤ 25, -30-27 ≤ <i>h</i> ≤ 26, -16 ≤ <i>k</i> ≤ 20, -33 ≤ <i>l</i> ≤ 30                 | -26 ≤ <i>h</i> ≤ 26, -25 ≤ <i>k</i> ≤ 25, -30-27 ≤ <i>h</i> ≤ 26, -16 ≤ <i>k</i> ≤ 20, -33 ≤ <i>l</i> ≤ 30 |
| Reflections collected                                         | 124691                                                                                                                                                          | 57066                                                                                                                      | 76684                                                                                                      |
| Independent reflections                                       | 10850 [ <i>R</i> <sub>int</sub> = 0.0958, <i>R</i> <sub>sigma</sub> = 0.0316]                                                                                   | 9294 [ <i>R</i> <sub>int</sub> = 0.0559, <i>R</i> <sub>sigma</sub> = 0.0293]                                               | 20683 [ <i>R</i> <sub>int</sub> = 0.0333, <i>R</i> <sub>sigma</sub> = 0.0349]                              |
| Data/restraints/parameters                                    | 10850/457/602                                                                                                                                                   | 9294/576/612                                                                                                               | 20683/0/775                                                                                                |
| Goodness-of-fit on <i>F</i> <sup>2</sup>                      | 1.089                                                                                                                                                           | 1.045                                                                                                                      | 1.022                                                                                                      |
| Final <i>R</i> indexes [ <i>I</i> >= 2 $\sigma$ ( <i>I</i> )] | <i>R</i> <sub>1</sub> = 0.0915, <i>wR</i> <sub>2</sub> = 0.2310                                                                                                 | <i>R</i> <sub>1</sub> = 0.0582, <i>wR</i> <sub>2</sub> = 0.1565                                                            | <i>R</i> <sub>1</sub> = 0.0230, <i>wR</i> <sub>2</sub> = 0.0425                                            |
| Final <i>R</i> indexes [all data]                             | <i>R</i> <sub>1</sub> = 0.0931, <i>wR</i> <sub>2</sub> = 0.2340                                                                                                 | <i>R</i> <sub>1</sub> = 0.0663, <i>wR</i> <sub>2</sub> = 0.1653                                                            | <i>R</i> <sub>1</sub> = 0.0339, <i>wR</i> <sub>2</sub> = 0.0447                                            |
| Largest diff. peak/hole (e Å <sup>-3</sup> )                  | 4.59/-2.75                                                                                                                                                      | 2.65/-0.97                                                                                                                 | 1.20/-0.93                                                                                                 |
| Flack parameter                                               | 0.010(9)                                                                                                                                                        | -0.027(11)                                                                                                                 |                                                                                                            |
| CCDC deposition number                                        | 2280948                                                                                                                                                         | 2280949                                                                                                                    | 2280950                                                                                                    |

Note: a, The hydrogen atoms in the dichloromethane and water solvent molecules were not located, but are included in the formula. b, The hydrogen atoms in the water solvent molecules were not located, but are included in the formula.

**Supplementary Table 2.** Important bond lengths and angles of *SS-2*<sup>NHC</sup>, *RR-2*<sup>NHC</sup> and *2*<sup>TPP</sup>.

|                                                           | <i>SS-2</i> <sup>NHC</sup> | <i>RR-2</i> <sup>NHC</sup> | <i>2</i> <sup>TPP</sup>   |
|-----------------------------------------------------------|----------------------------|----------------------------|---------------------------|
| Au <sup>I</sup> ⋯Au <sup>I</sup> distances (Å)            | 2.8667(10) – 3.3141(15)    | 2.8927(10) – 3.3321(15)    | 2.85528(18) – 3.21332(19) |
| C <sub>centre</sub> –Au <sup>I</sup> (Å)                  | 2.03(2) – 2.075(8)         | 2.01(2) – 2.089(8)         | 2.064(3) – 2.082(3)       |
| C <sub>NHC</sub> –Au <sup>I</sup> (Å)                     | 2.03(2) – 2.08(4)          | 2.03(4) – 2.077(19)        | –                         |
| P–Au <sup>I</sup> (Å)                                     | –                          | –                          | 2.2546(8) – 2.2735(8)     |
| Au <sup>I</sup> –C <sub>centre</sub> –Au <sup>I</sup> (°) | 87.4(3) – 163.7(14)        | 88.2(2) – 172.3(13)        | 86.95(10) – 174.31(16)    |

**Supplementary Table 3.** Bond length (*d*, Å) and Wiberg bond order (WBO) of C<sub>centre</sub>–Au<sup>I</sup> and Au<sup>I</sup>⋯Au<sup>I</sup> in different CAu<sub>*n*</sub> (*n* = 5, 6) clusters.

|                                      | <i>LiPr</i> –CAu <sub>6</sub> <sup>I</sup> <sup>5</sup>                            |      | <i>SS-1</i> <sup>NHC</sup>                                                         |                          | <i>SS-2</i> <sup>NHC</sup>                                                           |                          |                          |
|--------------------------------------|------------------------------------------------------------------------------------|------|------------------------------------------------------------------------------------|--------------------------|--------------------------------------------------------------------------------------|--------------------------|--------------------------|
|                                      | 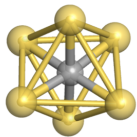 |      |  |                          |  |                          |                          |
|                                      | <i>d</i>                                                                           | WBO  | <i>d</i>                                                                           | WBO                      | <i>d</i>                                                                             | WBO                      |                          |
| C <sub>centre</sub> –Au <sup>I</sup> | 2.19                                                                               | 0.41 | 2.22                                                                               | 0.40                     | 2.09-2.16                                                                            | 0.50-0.57                |                          |
| Au <sup>I</sup> ⋯Au <sup>I</sup>     | 3.10                                                                               | 0.16 | 2.95-3.45                                                                          | 0.12-0.18<br>(avg. 0.16) | 2.96-3.48                                                                            | 0.13-0.20<br>(avg. 0.18) |                          |
|                                      |                                                                                    |      |                                                                                    | <i>1</i> <sup>TPP</sup>  |                                                                                      | <i>2</i> <sup>TPP</sup>  |                          |
|                                      |                                                                                    |      |                                                                                    | <i>d</i>                 | WBO                                                                                  | <i>d</i>                 | WBO                      |
| C <sub>centre</sub> –Au <sup>I</sup> |                                                                                    |      |                                                                                    | 2.19                     | 0.40                                                                                 | 2.10-2.16                | 0.50-0.55                |
| Au <sup>I</sup> ⋯Au <sup>I</sup>     |                                                                                    |      |                                                                                    | 3.06-3.13                | 0.15                                                                                 | 3.00-3.65                | 0.10-0.18<br>(avg. 0.16) |

Note: Wiberg bond orders were obtained by NBO 3.1<sup>6</sup> as implemented in Gaussian 16.

**Supplementary Table 4.** Excited states of  $SS-2^{\text{NHC}}$  with oscillator strength ( $f$ ) larger than 0.04 calculated by TD-DFT.

| State number | $\lambda$ (nm) | $\Delta E$ (eV) | $f$    | Transition character |
|--------------|----------------|-----------------|--------|----------------------|
| 2            | 415            | 2.988           | 0.1780 | H-1→L                |
| 3            | 402            | 3.084           | 0.2933 | H-2→L                |
| 4            | 393            | 3.152           | 0.2647 | H→L+1                |
| 6            | 363            | 3.420           | 0.2269 | H-2→L+1              |
| 11           | 333            | 3.727           | 0.1735 | H-1→L+3              |
| 13           | 329            | 3.771           | 0.0524 | H-2→L+2              |
| 14           | 325            | 3.810           | 0.1335 | H-2→L+3              |
| 15           | 324            | 3.825           | 0.1634 | H→L+5                |
| 17           | 313            | 3.961           | 0.0787 | H→L+7                |
| 20           | 307            | 4.035           | 0.0530 | H-1→L+5              |
| 75           | 272            | 4.552           | 0.1748 | H-5→L                |
| 76           | 272            | 4.554           | 0.0452 | H-2→L+19             |
| 84           | 269            | 4.617           | 0.040  | H→L+32               |
| 94           | 266            | 4.668           | 0.2829 | H-12→L               |
| 96           | 265            | 4.676           | 0.0543 | H-10→L               |
| 97           | 264            | 4.695           | 0.1277 | H-11→L               |
| 102          | 260            | 4.760           | 0.0774 | H-3→L+4              |
| 103          | 260            | 4.766           | 0.0634 | H-4→L+1              |
| 105          | 259            | 4.795           | 0.1234 | H-5→L+1              |
| 137          | 247            | 5.015           | 0.1237 | H-11→L+1             |
| 155          | 243            | 5.109           | 0.0768 | H-4→L+4              |
| 177          | 236            | 5.249           | 0.0516 | H-24→L+1, H-6→L+4    |

**Supplementary Table 5.** Excited states of  $2^{\text{TPP}}$  with oscillator strength ( $f$ ) larger than 0.04 calculated by TD-DFT.

| State number | $\lambda$ (nm) | $\Delta E$ (eV) | $f$    | Transition character |
|--------------|----------------|-----------------|--------|----------------------|
| 4            | 347            | 3.569           | 0.1698 | H-1→L, H→L+1         |
| 32           | 303            | 4.088           | 0.1118 | H→L+13               |
| 33           | 302            | 4.103           | 0.0543 | H-2→L+9, H-1→L+11    |
| 34           | 302            | 4.106           | 0.0666 | H-1→L+11, H-2→L+9    |
| 41           | 296            | 4.187           | 0.2400 | H-2→L+10             |
| 46           | 288            | 4.306           | 0.1047 | H-2→L+11             |
| 48           | 287            | 4.319           | 0.0545 | H→L+17               |
| 57           | 281            | 4.409           | 0.0677 | H-1→L+19             |
| 59           | 281            | 4.415           | 0.1198 | H-1→L+20             |
| 60           | 281            | 4.417           | 0.1018 | H-1→L+18             |
| 89           | 261            | 4.748           | 0.0684 | H-3→L+2, H-1→L+31    |
| 90           | 261            | 4.751           | 0.0444 | H-1→L+31             |
| 92           | 261            | 4.756           | 0.0964 | H-3→L+3              |
| 95           | 259            | 4.781           | 0.0517 | H-3→L+4              |
| 105          | 257            | 4.832           | 0.2554 | H-3→L+9              |
| 106          | 255            | 4.853           | 0.0494 | H→L+32, H→L+33       |
| 107          | 255            | 4.857           | 0.0606 | H-1→L+32             |
| 112          | 252            | 4.929           | 0.0459 | H-2→L+30             |
| 113          | 251            | 4.932           | 0.0902 | H-4→L+1              |
| 119          | 246            | 5.033           | 0.0689 | H-6→L                |
| 122          | 246            | 5.044           | 0.0786 | H-6→L+1              |
| 127          | 243            | 5.097           | 0.0829 | H-5→L+4, H-4→L+7     |
| 128          | 243            | 5.099           | 0.0427 | H-5→L+7              |
| 190          | 227            | 5.452           | 0.0902 | H→L+35               |
| 191          | 227            | 5.453           | 0.0456 | H→L+35               |
| 193          | 227            | 5.464           | 0.0464 | H-1→L+35             |
| 195          | 227            | 5.470           | 0.0549 | H-1→L+35             |

**Supplementary Table 6.** Orbital composition analysis with Mulliken partition of *SS-2*<sup>NHC</sup>.

|        | Au    | carbon-centre | NHC   |
|--------|-------|---------------|-------|
| LUMO+3 | 6.8%  | 0.2%          | 93.0% |
| LUMO+2 | 7.2%  | 0.8%          | 92.0% |
| LUMO+1 | 25.0% | 0.1%          | 74.8% |
| LUMO   | 35.2% | 0.1%          | 64.7% |
| HOMO   | 55.4% | 32.5%         | 12.1% |
| HOMO-1 | 53.0% | 29.7%         | 17.4% |
| HOMO-2 | 52.6% | 26.9%         | 20.6% |
| HOMO-3 | 79.9% | 0.1%          | 19.9% |

**Supplementary Table 7.** Orbital composition analysis with Mulliken partition of *2*<sup>TPP</sup>.

|        | Au    | carbon-centre | TPP   |
|--------|-------|---------------|-------|
| LUMO+3 | 1.1%  | 0.1%          | 98.7% |
| LUMO+2 | 1.5%  | 0.1%          | 98.4% |
| LUMO+1 | 22.4% | 0.0%          | 77.5% |
| LUMO   | 22.8% | 0.0%          | 77.2% |
| HOMO   | 51.0% | 32.3%         | 16.7% |
| HOMO-1 | 50.6% | 32.2%         | 17.1% |
| HOMO-2 | 51.4% | 30.1%         | 18.6% |
| HOMO-3 | 53.4% | 0.1%          | 46.6% |

**Supplementary Table 8.** Orbital composition analysis with Mulliken partition of *1*<sup>TPP</sup>.

|        | Au    | carbon-centre | TPP   |
|--------|-------|---------------|-------|
| LUMO+3 | 2.9%  | 0.1%          | 97.1% |
| LUMO+2 | 43.0% | 0.1%          | 56.9% |
| LUMO+1 | 43.3% | 0.1%          | 56.6% |
| LUMO   | 42.5% | 0.1%          | 57.4% |
| HOMO   | 46.7% | 29.2%         | 24.0% |
| HOMO-1 | 46.5% | 29.6%         | 24.0% |
| HOMO-2 | 48.6% | 29.4%         | 22.0% |
| HOMO-3 | 42.3% | 0.2%          | 57.5% |

**Supplementary Table 9.** TD-DFT calculated emission values of *SS-1*<sup>NHC</sup> and *SS-2*<sup>NHC</sup>.

|                            | Calculated |      | Experimental |      |
|----------------------------|------------|------|--------------|------|
|                            | nm         | eV   | nm           | eV   |
| <i>SS-1</i> <sup>NHC</sup> | 609        | 2.04 | 525          | 2.36 |
| <i>SS-2</i> <sup>NHC</sup> | 691        | 1.79 | 676          | 1.83 |



**Supplementary Table 10.** Crystallographic data of *SS-4*<sup>NHC</sup> and *RR-4*<sup>NHC</sup>.

| Identification code                                          | <i>SS-4</i> <sup>NHC</sup>                                                                                                     | <i>RR-4</i> <sup>NHC</sup>                                                                                                 |
|--------------------------------------------------------------|--------------------------------------------------------------------------------------------------------------------------------|----------------------------------------------------------------------------------------------------------------------------|
| Empirical formula                                            | C <sub>116</sub> H <sub>110</sub> Au <sub>6</sub> BClF <sub>4</sub> N <sub>10</sub> ·<br>4(CH <sub>3</sub> COCH <sub>3</sub> ) | C <sub>116</sub> H <sub>110</sub> Au <sub>6</sub> BClF <sub>4</sub> N <sub>10</sub> ·4(CH <sub>3</sub> COCH <sub>3</sub> ) |
| Formula weight                                               | 3180.60                                                                                                                        | 3181.60                                                                                                                    |
| Temperature (K)                                              | 93                                                                                                                             | 93                                                                                                                         |
| Crystal system                                               | monoclinic                                                                                                                     | monoclinic                                                                                                                 |
| Space group                                                  | <i>P</i> 2 <sub>1</sub>                                                                                                        | <i>P</i> 2 <sub>1</sub>                                                                                                    |
| <i>a</i> (Å)                                                 | 16.3948(2)                                                                                                                     | 16.4675(3)                                                                                                                 |
| <i>b</i> (Å)                                                 | 17.01066(19)                                                                                                                   | 17.0294(2)                                                                                                                 |
| <i>c</i> (Å)                                                 | 21.6028(2)                                                                                                                     | 21.6245(2)                                                                                                                 |
| <i>α</i> (°)                                                 | 90                                                                                                                             | 90                                                                                                                         |
| <i>β</i> (°)                                                 | 95.2435(12)                                                                                                                    | 95.4511(13)                                                                                                                |
| <i>γ</i> (°)                                                 | 90                                                                                                                             | 90                                                                                                                         |
| Volume (Å <sup>3</sup> )                                     | 5999.52(12)                                                                                                                    | 6036.78(14)                                                                                                                |
| <i>Z</i>                                                     | 2                                                                                                                              | 2                                                                                                                          |
| $\rho_{\text{calc}}$ (g cm <sup>-3</sup> )                   | 1.761                                                                                                                          | 1.750                                                                                                                      |
| $\mu$ (mm <sup>-1</sup> )                                    | 14.142                                                                                                                         | 14.054                                                                                                                     |
| <i>F</i> (000)                                               | 3072.0                                                                                                                         | 3072.0                                                                                                                     |
| Crystal size (mm <sup>3</sup> )                              | 0.01 × 0.01 × 0.01                                                                                                             | 0.01 × 0.01 × 0.01                                                                                                         |
| Radiation                                                    | CuK $\alpha$ ( $\lambda$ = 1.54184)                                                                                            | CuK $\alpha$ ( $\lambda$ = 1.54184)                                                                                        |
| 2 $\theta$ range for data collection (°)                     | 5.414 to 144.918                                                                                                               | 5.39 to 144.51                                                                                                             |
| Index ranges                                                 | -20 ≤ <i>h</i> ≤ 19, -20 ≤ <i>k</i> ≤ 20, -26 ≤ <i>l</i> ≤ 24                                                                  | -19 ≤ <i>h</i> ≤ 19, -21 ≤ <i>k</i> ≤ 20, -26 ≤ <i>l</i> ≤ 20                                                              |
| Reflections collected                                        | 57723                                                                                                                          | 48169                                                                                                                      |
| Independent reflections                                      | 22817 [ <i>R</i> <sub>int</sub> = 0.0408, <i>R</i> <sub>sigma</sub> = 0.0443]                                                  | 19780 [ <i>R</i> <sub>int</sub> = 0.0576, <i>R</i> <sub>sigma</sub> = 0.0574]                                              |
| Data/restraints/parameters                                   | 22817/731/1424                                                                                                                 | 19780/733/1404                                                                                                             |
| Goodness-of-fit on <i>F</i> <sup>2</sup>                     | 1.062                                                                                                                          | 1.014                                                                                                                      |
| Final <i>R</i> indexes [ <i>I</i> ≥ 2 $\sigma$ ( <i>I</i> )] | <i>R</i> <sub>1</sub> = 0.0756, <i>wR</i> <sub>2</sub> = 0.1943                                                                | <i>R</i> <sub>1</sub> = 0.0873, <i>wR</i> <sub>2</sub> = 0.2169                                                            |
| Final <i>R</i> indexes [all data]                            | <i>R</i> <sub>1</sub> = 0.0787, <i>wR</i> <sub>2</sub> = 0.1984                                                                | <i>R</i> <sub>1</sub> = 0.0916, <i>wR</i> <sub>2</sub> = 0.2226                                                            |
| Largest diff. peak/hole (e Å <sup>-3</sup> )                 | 4.53/-2.61                                                                                                                     | 5.47/-2.65                                                                                                                 |
| Flack parameter                                              | 0.013(19)                                                                                                                      | 0.02(2)                                                                                                                    |
| CCDC deposition number                                       | 2280951                                                                                                                        | 2280952                                                                                                                    |

**Supplementary Table 11.** Important bond lengths and angles of *SS-4*<sup>NHC</sup> and *RR-4*<sup>NHC</sup>.

|                                                           | <i>SS-4</i> <sup>NHC</sup> | <i>RR-4</i> <sup>NHC</sup> |
|-----------------------------------------------------------|----------------------------|----------------------------|
| Au <sup>I</sup> ...Au <sup>I</sup> distances (Å)          | 2.8738(11) – 3.1436(11)    | 2.8732(12) – 3.1435(12)    |
| C <sub>centre</sub> –Au <sup>I</sup> (Å)                  | 2.05(2) – 2.159(18)        | 2.05(2) – 2.16(2)          |
| C <sub>NHC</sub> –Au <sup>I</sup> (Å)                     | 2.01(3) – 2.067(18)        | 2.01(2) – 2.11(2)          |
| Au <sup>I</sup> –Cl (Å)                                   | 2.308(6)                   | 2.310(7)                   |
| Au <sup>I</sup> –C <sub>centre</sub> –Au <sup>I</sup> (°) | 87.9(9) – 175.9(10)        | 84.7(6) – 175.3(10)        |

### Supplementary Note

#### *SS-2*<sup>NHC</sup>

PLAT306\_ALERT\_2\_B Isolated Oxygen Atom (H-atoms Missing ?) ..... O11 Check

Author Response: This alert is because of the solvent water molecule.

PLAT342\_ALERT\_3\_B Low Bond Precision on C-C Bonds ..... 0.02425 Ang.

Author Response: This alert is due to the limited diffraction resolution, particularly the weak diffraction at the high angle of the determined crystals.

#### *RR-4*<sup>NHC</sup>

PLAT306\_ALERT\_2\_B Isolated Oxygen Atom (H-atoms Missing ?) ..... O3 Check

Author Response: This alert is because of the solvent water molecule.

PLAT342\_ALERT\_3\_B Low Bond Precision on C-C Bonds ..... 0.02588 Ang.

Author Response: This alert is due to the limited diffraction resolution, particularly the weak diffraction at the high angle of the determined crystals.

#### *SS-4*<sup>NHC</sup>

PLAT342\_ALERT\_3\_B Low Bond Precision on C-C Bonds ..... 0.03595 Ang.

Author Response: This alert is due to the limited diffraction resolution, particularly the weak diffraction at the high angle of the determined crystals.

#### *RR-4*<sup>NHC</sup>

PLAT342\_ALERT\_3\_B Low Bond Precision on C-C Bonds ..... 0.04241 Ang.

Author Response: This alert is due to the limited diffraction resolution, particularly the weak diffraction at the high angle of the determined crystals.

### Supplementary References

1. Pei, X.-L. et al. Asymmetric twisting of C-centered octahedral gold(I) clusters by chiral N-heterocyclic carbene ligation. *J. Am. Chem. Soc.* **144**, 2156–2163 (2022).
2. Scherbaum, F., Grohmann, A., Huber, B., Krüger, C. & Schmidbaur, H. “Auophilicity” as a consequence of relativistic effects: the hexakis(triphenylphosphaneaurio) methane dication [(Ph<sub>3</sub>PAu)<sub>6</sub>C]<sup>2+</sup>. *Angew. Chem. Int. Ed. Engl.* **27**, 1544–1546 (1988).
3. Scherbaum, F., Grohmann, A., Müller, G. & Schmidbaur, H. Synthesis, structure, and bonding of the cation [(C<sub>6</sub>H<sub>5</sub>)<sub>3</sub>PAu]<sub>5</sub>C<sup>+</sup>. *Angew. Chem. Int. Ed. Engl.* **28**, 463–465 (1989).

4. Healy, P. C., Bradley T., Michael L. W. & Peter G. P. Synthesis, structure and cytotoxicity studies of four-coordinate bis(cis-bis(diphenylphosphino)ethene) gold(I) complexes.  $[\text{Au}(\text{dppey})_2]\text{X}$ . *J. Inorg. Biochem.* **104**, 625–631 (2010).
5. Ube, H., Zhang, Q. & Shionoya, M. A carbon-centered hexagold(I) cluster supported by *N*-heterocyclic carbene ligands. *Organometallics* **37**, 2007–2009 (2018).
6. Glendening, E. D., Reed, A. E., Carpenter, J. E. & Weinhold, F. NBO Version 3.1 (2001).
